1 **Peripheral nerve resident macrophages are microglia-like cells with tissue-specific**  
2 **programming**

3

4 Peter L Wang<sup>1,2\*</sup>, Aldrin KY Yim<sup>2\*</sup>, Kiwook Kim<sup>1</sup>, Denis Avey<sup>2</sup>, Rafael S. Czepielewski<sup>1</sup>, Marco  
5 Colonna<sup>1</sup>, Jeffrey Milbrandt<sup>2\*\*</sup>, Gwendalyn J Randolph<sup>1\*\*</sup> & The Immunological Genome Project

6

7 <sup>1</sup>Department of Pathology and Immunology, Division of Immunobiology, Washington University,  
8 School of Medicine, St. Louis, MO, 63110, USA

9 <sup>2</sup>Department of Genetics, Washington University, School of Medicine, St. Louis, MO, 63110, USA

10 \* These authors contributed equally

11 \*\* Correspondence: [jmilbrandt@wustl.edu](mailto:jmilbrandt@wustl.edu); [gjrandolph@wustl.edu](mailto:gjrandolph@wustl.edu)

12

13

14

15

16 **Summary:** Whereas microglia are recognized as fundamental players in central nervous system  
17 (CNS) development and function, much less is known about macrophages of the peripheral nervous  
18 system (PNS). Here we show that self-maintaining PNS macrophages share unique features with  
19 CNS microglia. By comparing gene expression across neural and conventional tissue-resident  
20 macrophages, we identified transcripts that were shared among neural resident macrophages as  
21 well as selectively enriched in PNS macrophages. Remarkably, PNS macrophages constitutively  
22 expressed genes previously identified to be upregulated by activated microglia during aging or  
23 neurodegeneration. Several microglial activation-associated and PNS macrophage-enriched genes  
24 were also expressed in spinal cord microglia at steady state. While PNS macrophages arose from  
25 both embryonic and hematopoietic precursors, their expression of activation-associated genes did  
26 not differ by ontogeny. Collectively, these data uncover shared and unique features between neural  
27 resident macrophages and emphasize the role of nerve environment for shaping PNS macrophage  
28 identity.

29 **Introduction:** The significant role of resident neural macrophages in neuroinflammation and disease  
30 progression is increasingly appreciated in mouse models and individuals with neurodegeneration (1,  
31 2, 3). Such advances, which largely rely on the interpretation of data from transcriptional analyses  
32 and human genome-wide association studies (GWAS) of Alzheimer's Disease (AD) and other  
33 neurodegenerative conditions, have led to critical findings about cellular and molecular processes  
34 underlying such diseases (4, 5, 6). Most of these studies, however, have focused on resident  
35 macrophages in the brain (microglia) and, to a lesser extent, the spinal cord. Meanwhile, the  
36 transcriptional identity and functions of resident macrophages in the PNS remain mostly unknown.

37         The PNS consists of a multitude of neuronal networks that relay motor and sensory  
38 information between the CNS and the rest of the body (7). Though it has the capacity to regenerate,  
39 the PNS is also prone to injury and degeneration (8). Studies of PNS injury have shown that PNS  
40 macrophages play important roles for debris clearance, pain development, and regeneration (9, 10,  
41 11). While the contribution of recruited monocytes cannot be excluded, these studies demonstrate  
42 the importance of PNS macrophages in nerve injury. Understanding the roles of these cells in  
43 homeostasis and disease may be broadly beneficial for resolving neuroinflammation.

44         In addition to monocyte-derived macrophages in nerve injury, there are also resident  
45 macrophages in the PNS at steady state (12, 13). While their residence in neuronal tissues is  
46 inherently microglia-like, PNS macrophages exist within a unique peripheral nerve  
47 microenvironment. Moreover, though it is known that CNS microglia are derived from the yolk sac  
48 during embryogenesis and depend on IL-34 for development (14, 15), the ontogeny of PNS  
49 macrophages remains unclear. Considering the growing interest in how tissue environment and  
50 ontogeny contribute to microglial identity and function in neurological diseases, we investigated  
51 these questions in peripheral nerve resident macrophages.

52

53

## 54 **Results**

55

### 56 **Resident macrophages of the PNS**

57 To examine resident macrophages in the PNS, we imaged a variety of nerve types at steady state  
58 using CX3CR1<sup>GFP/+</sup> reporter mice. In these mice, GFP effectively labels microglia and has been  
59 shown to label nerve-associated macrophages in adipose and enteric tissues (16, 17). CX3CR1-  
60 GFP<sup>+</sup> cells were found in dorsal root ganglia (DRG), vagal nerves (VN), subcutaneous fascial nerves  
61 (FN) and sciatic nerves (SN) (Fig. 1a). CX3CR1-GFP<sup>+</sup> cells were located in the endoneurium and  
62 expressed colony-stimulating factor 1 receptor (CSF1R), also known as CD115 (Fig. 1b-c). Using  
63 flow cytometry, we found that CX3CR1-GFP<sup>+</sup> cells also expressed the common macrophage marker  
64 CD64 (FcγR1) (18), as well as intermediate levels of CD45 (Fig. 1d-f). Thus, CX3CR1-GFP<sup>+</sup> cells in  
65 peripheral nerves are indeed macrophages with resemblance to CNS microglia based on both  
66 endoneurial localization and surface marker expression.

67 To determine whether PNS macrophages depend on circulating precursors or are  
68 maintained via local signals, we performed parabiosis in CD45.1<sup>+</sup> wild type and CD45.2<sup>+</sup> Lyz2Cre x  
69 tdTomato<sup>fl/fl</sup> mice and assessed the extent to which cells circulating from the parabiotic partner gave  
70 rise to PNS macrophages. Ten weeks after joining the parabionts, we found minimal exchange of  
71 PNS macrophages in all of the nerve types examined, while blood T cells and monocytes  
72 exchanged robustly (Fig. 1g; Supplementary Fig. 1). Indeed, most of the tdTomato<sup>+</sup> cells that could  
73 be seen in the wild type parabiont were localized to the tissue surrounding the nerves (Fig. 1h). We  
74 also performed pulse chase labeling of PNS macrophages using tamoxifen-inducible CSF1R<sup>Mer-iCre-</sup>  
75 <sup>Mer</sup> x tdTomato<sup>fl/fl</sup> mice. In these mice, tdTomato expression persists in self-maintaining cells, but not  
76 in monocytes, which mostly turn over by 3-4 weeks after tamoxifen removal (19, 20). Heterozygous  
77 mice were fed tamoxifen diet for 4 weeks and then switched to normal diet (Fig. 1i). Just following  
78 tamoxifen removal, 96% of PNS macrophages, 99% of CNS microglia, and 100% of blood  
79 monocytes were tdTomato<sup>+</sup> (Fig. 1j-l, Supplementary Fig. 2). Whereas only 20% of nonclassical and

80 classical monocytes were still tdTomato+ by 3 weeks after tamoxifen removal, 98% of CNS microglia  
81 and 95% of PNS macrophages remained labeled up to 8 weeks following tamoxifen removal (Fig. 11,  
82 Supplementary Fig. 2). Taken together, these results indicate that PNS macrophages are mostly  
83 self-maintained in adult mice.

84

### 85 **Transcriptional characterization of PNS macrophages**

86 As we and others have previously demonstrated, unique gene expression profiles can be obtained in  
87 tissue-resident macrophage populations across tissue types (18, 21). To identify signature genes in  
88 peripheral nerve macrophages, we performed bulk RNA-seq to compare purified PNS resident  
89 macrophages sorted from the dorsal root ganglia, vagal, subcutaneous fascial, and sciatic nerves  
90 (Supplementary Fig. 3) with CNS microglia from the brain and spinal cord as well as previously  
91 characterized “conventional” macrophage populations from spleen, peritoneal cavity, and lungs.  
92 Global transcriptomic analysis revealed similarities within resident neural macrophages from both  
93 PNS and CNS, with PNS macrophages clustering more closely to CNS microglia than to  
94 conventional macrophages (Fig. 2a, Supplementary table 1). A substantial number of genes were  
95 uniquely enriched in PNS macrophages and CNS microglia compared to the other tissue-resident  
96 macrophages, including microglial signature genes *Tmem119*, *P2ry12*, *Siglech*, *Trem2*, and *Olfml3*  
97 (Fig. 2b, c). PNS macrophage-specific genes were also identified (Fig. 2b).

98 To determine potential functions of PNS macrophages associated with their shared and  
99 unique gene expression profiles, we performed gene ontology (GO) analysis on transcripts that were  
100 common between PNS macrophages and CNS microglia and those that were specific to PNS  
101 macrophages (Supplementary table 2). Consistent with the idea that PNS macrophages may share  
102 functions with CNS microglia, pathway analysis identified functions including synaptic plasticity,  
103 microglial motility, and positive regulation of neurogenesis (Fig. 2d). Pathways that were unique to  
104 PNS macrophages included angiogenesis, collagen fibril organization, regulation of BMP signaling,  
105 and peripheral nerve structural organization and axon guidance (Fig. 2e).

106           Next, we identified transcripts that were 4-fold or more enriched in CNS microglia and PNS  
107 macrophages relative to their expression in all other conventional macrophage populations (Fig. 2f).  
108 These upregulated genes included *Abhd6*, *Ophn1*, *P2rx7*, *Pld1*, *Sgce*, *Tgfb1*, *Tfpi*, and *Tmem173*.  
109 We also identified several genes that were downregulated in CNS microglia and PNS macrophages  
110 (Supplementary Fig. 4). Notably, the transcriptional regulator that defines microglial identity and  
111 function, *Sall1*, was not expressed by PNS macrophages (Fig. 2c). Modest detection of *Sall1* in the  
112 DRG could not be corroborated by further analysis (Supplementary Fig. 5). This may reflect unique  
113 adaptations in PNS and CNS macrophages. Indeed, we identified 72 genes, including *Sall1*, that  
114 were highly specific to CNS microglia (Supplementary Fig. 6).

115           To examine unique gene expression in PNS macrophages, we identified transcripts that  
116 were at least 4-fold higher or lower in PNS macrophages compared to other resident macrophages,  
117 including CNS microglia (Fig. 2g, Supplementary Fig. 7). We found 48 genes specifically enriched in  
118 PNS macrophages, including *Aplnr*, *Cp*, *Il1rl1*, *Maoa*, *Pla2g2d*, and *St8sia4*, as well as interferon-  
119 induced genes *Ifi202b*, *Ifi211*, and *Oas2*. We also identified *Ms4a14*, *Ms4a4a*, *Ms4a4c*, *Ms4a6c*, and  
120 *Ms4a7*. These signatures reveal unique transcriptional programming in PNS macrophages and may  
121 provide clues about their involvement in neuronal health and disease.

122           We next investigated transcriptional differences within PNS macrophage populations. Using  
123 a 4-fold cutoff, we identified 24 genes enriched in sciatic nerve macrophages, 23 genes enriched in  
124 fascial nerve macrophages, and 12 genes enriched in vagal nerve macrophages (Supplementary  
125 Fig. 8a). We observed similar numbers of downregulated genes in each population (Supplementary  
126 Fig. 8b). We also compared nerve-resident macrophages to those residing within the dorsal root  
127 ganglion and found that they were significantly different, with many differentially expressed  
128 transcripts. Therefore, we re-analyzed this data using a more stringent 8-fold cutoff and identified 79  
129 upregulated genes and 52 downregulated genes (Supplementary Fig. 8c, d). These results suggest  
130 that while peripheral nerve macrophages are transcriptionally similar, significant differences exist  
131 between those adjacent to axons and those residing close to neuronal cell bodies.

132

### 133 **PNS macrophages express microglial activation genes**

134 To investigate differentially expressed genes (DEGs) within resident neural macrophages, we  
135 refined our analysis to CNS microglia and PNS macrophages (Fig. 3a). We identified 396 genes  
136 enriched in PNS macrophages and 180 genes enriched in CNS microglia (Supplementary Table 3).  
137 Since the upregulation of MS4A family and interferon-induced genes has been reported to  
138 characterize aged and neurodegenerative disease-associated microglia (6, 22, 23), we wondered if  
139 PNS macrophages expressed other genes associated with microglial activation. By cross-  
140 referencing published data, we determined the number of connections between disease-associated  
141 genes that were upregulated in activated microglia from aging, phagocytic, and neurodegenerative  
142 conditions and neural macrophage-enriched genes from either PNS macrophages or CNS microglia  
143 (Fig. 3b). We found 148 disease-associated genes that were enriched in PNS macrophages  
144 compared to 17 that were enriched in CNS microglia (Fig. 3b, Supplementary table 4). From the  
145 highest connectivity groups (6-4), we identified 25 genes that were significantly higher in PNS  
146 macrophages, including *Ch25h*, *Anxa2*, *Cd52*, *Ifitm3*, *Cybb*, *Fxyd5*, *Igf1*, and *ApoE* (Fig. 3c).

147 Microglia lacking certain genes for homeostatic regulation have also been found to shift their  
148 gene expression towards an activated phenotype (24, 25). *Sall1* has been identified as a  
149 transcriptional regulator of microglia identity and function, with *Sall1*<sup>-/-</sup> microglia resembling  
150 inflammatory phagocytes (24). Since PNS macrophages did not express *Sall1* at steady state, we  
151 examined whether genes that are reportedly dysregulated in *Sall1*<sup>-/-</sup> microglia showed the same  
152 pattern of expression in PNS macrophages. Indeed, we found a high correlation between genes  
153 enriched in PNS macrophages and *Sall1*<sup>-/-</sup> microglia, including *ApoE*, *H2-Aa*, *Ms4a7*, *Clec12a*, *Aoah*,  
154 and *Cybb* (Fig. 3c). These data suggest that PNS macrophages may share common genetic  
155 regulators with CNS microglia.

156 Since microglia activation may occur under cell sorting conditions (26), we were concerned  
157 that the activation signature in PNS macrophages might be attributed to tissue preparation. Thus, we

158 stained freshly fixed peripheral nerves for Clec7a and MHCII, which are induced in microglia across  
159 many activation states (6, 25, 27). Resting PNS macrophages were clearly marked by Clec7a and  
160 MHCII (Fig. 3e), suggesting that the signature obtained in PNS macrophages is not a technical  
161 artifact. Taken together, these data show that PNS macrophages constitutively express a wide array  
162 of microglial activation genes and imply a shared yet microenvironment-sensitive regulation of gene  
163 expression in resident neural macrophages.

164

### 165 **PNS to CNS zonation in resident neural macrophages**

166 Given the difference in gene expression between PNS macrophages and CNS microglia, we wanted  
167 to further discriminate the influence of microenvironment on neural macrophage identity. Thus, we  
168 examined spinal cord microglia, which reside in a distinct microenvironment from brain microglia.  
169 Interestingly, we found a set of genes that were high in PNS macrophages, intermediate to high in  
170 spinal cord microglia, and low in brain microglia (PNS to CNS zonation) (Fig. 4a, Suppl. Table). These  
171 included PNS macrophage-specific genes (*Cp*, *I11r11*, *Maoa*, and *Cdr2*), microglial activation genes  
172 (*Clec7a*, *Spp1*, *Lpl*, *Axl*, *Ms4a4c*, and *Ms4a6c*), interferon-induced genes (*Ifi204*, *Ifi207*, *Ifi209*, and  
173 *Oasl2*), mitochondrially encoded genes (*mt-Nd1*, *mt-Nd2*, *mt-Nd4*, *mt-Nd5*, and *mt-Nd6*), and several  
174 transcription factors (*Hivep2*, *Zfp704*, and *Rbpj*) (Fig. 4b, c). We confirmed *Clec7a* expression in spinal  
175 cord microglia by immunostaining (Fig. 4c). Importantly, microglia from spinal cord and brain did not  
176 significantly differ by expression of homeostatic genes *Sall1*, *Olfml3*, and *Tmem119* (Supplementary  
177 Fig. 9). In fact, certain microglial genes, including *Tgfbr1* and *P2ry12* were more highly expressed in  
178 spinal cord compared to brain microglia. These findings suggest that transcriptional programs  
179 underlying PNS macrophages and activated microglia may be present during normal physiological  
180 conditions and further support the role of nerve environment for specifying neural macrophage identity.

181

### 182 **Ontogeny of PNS resident macrophages**



183 In addition to microenvironmental cues, ontogeny may also play an important role for specifying  
184 microglial identity and function. Specifically, it has been shown that, compared to naturally occurring  
185 microglia with yolk sac origin, monocyte- and hematopoietic stem cell (HSC)-derived microglia  
186 display a more activated signature (28, 29). Thus, we sought to determine PNS macrophage  
187 ontogeny by examining Flt3Cre x LSL-YFP<sup>fl/fl</sup> reporter mice (Fig. 5a), a strain that labels fetal  
188 monocyte and adult HSC-derived hematopoietic multipotent progenitors and their progeny (30, 31).  
189 We found that approximately 26% of PNS macrophages across nerve types appeared to be  
190 embryonically derived (YFP-) and 74% of PNS macrophages were HSC-derived (YFP+) (Fig. 5b, c).

191 To further examine the contribution of embryonic precursors to PNS macrophages, we  
192 performed fate mapping using CSF1R<sup>Mer-iCre-Mer</sup> x tdTomato<sup>fl/fl</sup> x CX3CR1<sup>GFP/+</sup> double reporter mice,  
193 which allows simultaneous visualization of tamoxifen-pulsed CSF1R-expressing macrophages and  
194 resident Cx3cr1+ macrophages. After giving tamoxifen at embryonic day 8.5 (E8.5), a  
195 developmental time point that labels yolk-sac derived macrophages, we checked newborn pups for  
196 labeling. The PNS was fully populated with CX3CR1-GFP/+ macrophages at birth. In line with  
197 previous observations (32), we observed partial labeling in 42% of brain microglia (Fig. 5c). Labeling  
198 in PNS macrophages was 8% from sciatic nerve and DRG, or roughly one-fifth of the entire PNS  
199 macrophage population when normalized to microglia (Fig. 5c). Less than 1% of macrophages were  
200 tdTomato+ in spleen, kidney, and blood, and only 3% of lung macrophages were tdTomato+ (Fig.  
201 5c, Supplementary Fig. 12). These results demonstrate that the PNS is fully populated by  
202 macrophages at the time of birth and that a subset of these cells are derived from yolk sac  
203 progenitors.

204 While monocyte entry into injured nerves depends on Ccr2 (33, 34), it is not known whether  
205 Ccr2 is required for seeding or maintaining the PNS macrophage niche. To address this question,  
206 we quantified CSF1R+ macrophages in sciatic nerves of Ccr2 knock-in (Ccr2<sup>GFP/GFP</sup>) and control  
207 (Ccr2<sup>GFP/+</sup>) mice. We observed no difference in PNS macrophage numbers between Ccr2 knockouts  
208 and controls (Fig 5e-g). However, while GFP+ cells were present in sciatic nerves from Ccr2<sup>GFP/+</sup>

209 mice, GFP+ cells were totally absent from  $Ccr2^{GFP/GFP}$  mice (Fig. 5e, f). These observations suggest  
210 that  $Ccr2$ -dependent monocyte entry is not required to fill or maintain the PNS macrophage niche,  
211 but may contribute to a modest subset of PNS macrophages at steady state.

212         Given the resemblance between microglia and PNS macrophages, we wondered if IL-34, an  
213 alternative ligand for CSF1R that contributes to CNS microglia development (15), is likewise  
214 important for PNS macrophage development. We thus quantified PNS macrophages in sciatic  
215 nerves of IL-34 deficient mice ( $IL-34^{LacZ/LacZ}$ ) and found a 30% reduction in PNS macrophage  
216 percentage by flow cytometry (Fig. 5h-i) and nearly 60% reduction in total numbers in IL-34 KO mice  
217 when quantified in sections (Fig. 5j-k), underscoring significant dependence on IL-34. To determine  
218 what cells in the nerve were producing IL-34, we checked IL-34 transcriptional localization by in situ  
219 hybridization. Surprisingly, we found that Prx-expressing myelinating Schwann cells were a source  
220 of IL-34 (Fig. 5l). In the absence of IL-34, PNS macrophages showed increased surface marker  
221 expression of CD45 and CD11b, suggesting a shift in phenotype away from microglial  
222 characteristics (Fig. 5m). Taken together, these results reveal shared and unique developmental  
223 programs between PNS macrophages and CNS microglia.

224

### 225 **Nerve environment shapes PNS macrophage signature**

226 To investigate the extent to which PNS macrophage identity is specified by ontogeny or nerve  
227 environment, we individually sorted YFP- embryonic-derived and YFP+ HSC-derived PNS  
228 macrophages from sciatic nerves of  $Flt3Cre$  LSL-YFP<sup>fl/fl</sup> mice and performed single cell RNA-seq  
229 (Fig. 6a). We captured a total of 935 YFP- cells and 3,186 YFP+ cells. Unsupervised clustering  
230 analysis of all 4,121 cells revealed 5 separate clusters, with the majority of PNS macrophages  
231 belonging to one major group (clusters 1, 2, and 3) and the remainder falling into two smaller  
232 clusters (4 and 5) (Fig. 6b, Supplementary table 5).

233         While we observed a significant overlap of YFP- and YFP+ macrophages in clusters 1, 3, 4,  
234 and 5, cluster 2 contained mostly YFP+ macrophages (Fig 6b). Interestingly, cluster 2 was defined

235 by *Ccr2* (and *S100a6*) expression, which is consistent with this subset arising from circulating  
236 precursors (Fig. 6c). Indeed, we confirmed by flow cytometry that CCR2+ PNS macrophages were  
237 only found in the YFP+ fraction (Fig. 6f). We also observed varying heterogeneity between the  
238 overlapping clusters (Fig. 6c). For instance, cluster 5 was easily distinguished by proliferation genes  
239 *Mki67* and *Top2a*. Cluster 4 was also relatively distinct and showed enrichment for *Ly6e*, *Ninj1*,  
240 *Retnla*, and *Wfdc17*, potentially representing a previously undescribed activation state. Cluster 3  
241 selectively expressed early activation genes *Fos*, *Jun*, and *Egr1* and may represent cells from  
242 clusters 1 and 2 undergoing acute activation from cell preparation and sorting. Cluster 1, the least  
243 distinct population, was slightly enriched for *Lyve1* expression compared to cluster 2 (Fig. 6c). We  
244 confirmed *Lyve1* expression in a subset of PNS macrophages by immunostaining (Fig 6g).

245         Despite the identification of separate clusters in our data, we observed no obvious difference  
246 in the expression of PNS macrophage-enriched or microglial activation-associated transcripts  
247 between the main clusters. Specifically, *Apoe*, *Cp*, *H2-Aa*, *Cd74*, *Ms4a6c*, *Ifitm3*, *Anxa5*, *Cybb*, and  
248 *Cd52* were nearly identical between clusters 1, 2, and 3 (Fig. 6d). We also observed no difference in  
249 *Cx3cr1* and *Trem2* between these clusters. Importantly, all of these genes were equally expressed  
250 between YFP- and YFP+ macrophages (Fig. 6e). We conclude that embryonic- and HSC-derived  
251 PNS macrophages are transcriptionally similar and that the nerve environment confers a  
252 predominant effect over developmental origin on PNS macrophage identity.

253

254

## 255 **Discussion**

256 PNS-resident endoneurial macrophages are a previously unprofiled population of neural resident  
257 macrophages. Here we characterized the transcriptomes of PNS resident macrophages across  
258 various nerve types spanning both axons and cell bodies and innervating a wide range of somatic  
259 targets. We show that self-maintaining PNS macrophages possess shared gene expression programs  
260 with CNS microglia as well as a unique set of genes shaped by the nerve environment. The  
261 convergence of both HSC-derived and embryonic PNS macrophages into a single population at  
262 steady state underscores the importance of tissue environment for specifying PNS macrophage  
263 identity.

264 Our findings demonstrate that PNS macrophages share a significant overlap in gene  
265 expression with CNS microglia. This resembles recent findings that show microglial genes being  
266 expressed in nerve-associated macrophages in gut and adipose tissues (16, 17). While PNS  
267 macrophages reside in the nerve proper, there are likely common tissue factors that induce nerve-  
268 imprinted signatures in macrophages. One such factor may be transforming growth factor beta (TGF-  
269  $\beta$ ). TGF- $\beta$  signaling is vital for the expression of homeostatic genes in microglia (2, 3). The higher  
270 expression of *Tgfb1* in PNS macrophages and CNS microglia at steady state supports the role of  
271 TGF- $\beta$  signaling in neural resident macrophages.

272 We were surprised that *Sall1* expression was so low in PNS macrophages. This likely  
273 represents a key difference in PNS and CNS nerve environments. The identification of additional  
274 genes that were purely expressed in CNS microglia may provide clues for the basis of this difference.  
275 Future studies should address genetic and environmental factors that regulate *Sall1* expression and  
276 examine whether it is expressed in a context-dependent manner in PNS macrophages.

277 The constitutive expression of a broad set of microglial activation genes in PNS macrophages  
278 and, to a lesser degree, in spinal cord microglia suggests that such programs may be intrinsic to their  
279 functioning in distinct neuronal environments. Indeed, it was found that sympathetic nerve-associated  
280 (SAM) macrophages and macrophages at CNS interfaces also appear to be constitutively activated

281 (16, 35, 36). Additionally, an overlap in many of the same activation genes are induced in microglia  
282 localized to white matter tracts during brain development (37). However, this is the first time that  
283 endoneurial macrophages in the PNS have been shown to possess activation signatures at steady  
284 state. Further studies are needed to determine whether immune response, phagocytic and tissue  
285 remodeling programs are more prevalent at steady state.

286 While the connection between neurodegeneration and immune response has become  
287 increasingly apparent, how distinct expression patterns relate to neuronal disease, development, and  
288 homeostasis remains a mystery. Ontogeny seems to be an important factor, as shown by several  
289 studies that found upregulation of disease-associated genes and neurotoxic functions in transplanted  
290 cells with hematopoietic origin (28, 29). Our results show that both embryonic and HSC-derived PNS  
291 macrophages exist as a transcriptionally similar population in adult nerves regardless of origin, thus  
292 suggesting a more important role for nerve environment in programming neural resident macrophages  
293 at specific sites. Moreover, since PNS macrophages are a naturally occurring population, they serve  
294 as a useful standard of comparison in the context of normal physiological function.

295 Up to now, the brain and spinal cord of the CNS are the only tissues thought to possess  
296 microglia. Our comparison of resident macrophages from both PNS and CNS challenges this notion  
297 and supports the idea that microglial features and transcriptional programs are shared in macrophages  
298 across the nervous system. The increasing amount of transcriptomic data on microglia and nerve-  
299 associated macrophages from different tissues and across organs presents opportunities for novel  
300 discoveries that may be applied to neurodegenerative conditions and beyond.

301 **Figure Legends:**

302

303 Figure 1) Identification and characterization of PNS resident macrophages. (a, b, c) Representative  
304 confocal imaging of peripheral nerves from CX3CR1<sup>GFP/+</sup>MPZ<sup>tdTomato</sup> mice. (a) Images of whole  
305 mount dorsal root ganglia, subcutaneous fascia, vagal and sciatic nerves isolated  
306 from CX3CR1<sup>GFP/+</sup>MPZ<sup>tdTomato</sup> mice. Scale bars are 50 microns ( $\mu\text{m}$ ). (b) Endoneurial localization  
307 of CX3CR1<sup>GFP/+</sup> cells in longitudinal sections of sciatic nerves; (c) Csf1r (blue) and CX3CR1<sup>GFP</sup>  
308 (green) colocalization in sciatic nerve cross sections. Scale bars are 50  $\mu\text{m}$ . (d) Flow cytometric  
309 gating of CX3CR1<sup>GFP/+</sup> cells from peripheral nerve tissues. (e, f) Representative expression of  
310 CD64 and CD45 in CX3CR1<sup>GFP/+</sup> cells compared to brain microglia, large peritoneal macrophages  
311 (LPMs), and fluorescence minus one (FMO) control. (g) Flow cytometric quantification of CD45.1  
312 and CD45.2 chimerism in blood (total T cells or total monocytes) and nerves from 3 pairs of WT  
313 (CD45.1) and Ly2Cre tdTomato (CD45.2) parabionts 10 weeks after joining; (h) Representative  
314 imaging in peripheral nerves from WT parabiont; Scale bars are 100  $\mu\text{m}$ ; (i-l) Analysis of tdtomato  
315 expression in tamoxifen-pulsed CSF1R<sup>Mer-iCre-Mer</sup> x Rosa26-tdTomato mice. (i) Tamoxifen delivery  
316 schematic for fate mapping. Mice were given tamoxifen diet for 4 weeks and analyses for PNS  
317 macrophages and CNS microglia were performed at 0 days and 8 weeks after tamoxifen diet  
318 removal. (j) tdTomato expression by genotype from combined peripheral nerves in tamoxifen-fed  
319 mice. (k) Flow cytometric quantification of Ly6c high and Ly6C low monocytes from mice bled at 0  
320 days, 3 weeks, 4 weeks, and 8 weeks after tamoxifen removal. (l) Flow cytometric quantification  
321 of CNS microglia (brain and spinal cord) and PNS macrophages (DRG, fascia nerve, vagus  
322 nerve, sciatic nerve) 0 days and 8 weeks following tamoxifen removal. (n=3 mice per time point)  
323 Data are mean +/- SEM.

324

325 Figure 2) PNS macrophages express microglial transcripts as well as a unique signature. (a) Sample  
326 correlation plot showing global transcriptomic analysis and hierarchical clustering of resident

327 macrophages from PNS, CNS, and conventional macrophages. Each box represents one replicate.  
328 3 replicates comprised of up to 20 mice per replicate were included for each population. (b)  
329 Visualization of PNS macrophage unique transcripts (upper quadrant), CNS microglia unique  
330 transcripts (right quadrant), shared transcripts between PNS macrophages and CNS microglia  
331 (diagonal, top right quadrant), and conventional macrophages (bottom right quadrant). (c)  
332 Expression of microglial core transcripts in PNS macrophages compared with conventional  
333 macrophages. Multiple t tests. Data are mean +/- SEM. \* P < 0.05, \*\* P < 0.01, \*\*\* P < 0.001, \*\*\*\* P  
334 < 0.0001. (d) GO analysis of genes enriched in PNS macrophages and CNS microglia. (e) GO  
335 analysis of genes enriched in PNS macrophages. (f) Transcripts expressed at least 4-fold higher in  
336 PNS macrophages and CNS microglia than conventional tissue-resident macrophages ( $p \leq 0.05$ ).  
337 (g) Transcripts expressed at least 4-fold higher in PNS macrophages than CNS microglia or  
338 conventional macrophages ( $p \leq 0.05$ ). (f, g) Each box represents average of three replicates.  
339  
340 Figure 3) PNS macrophages constitutively express transcripts associated with activated microglia.  
341 (a) Expression pattern of DEGs defined as PNS-enriched (red) or CNS-enriched (blue). CNS  
342 microglia includes brain and spinal cord and PNS macrophages include DRG, vagal, fascial, and  
343 sciatic nerves. (b) Circos plot showing the number of connections between GSEA-scored genes  
344 from microglia in 6 neurodegenerative and aging-associated conditions as defined in Krasemann et  
345 al. and neural macrophage-enriched genes from either PNS macrophages or CNS microglia (gene  
346 connectivity). (c) PNS-enriched genes from connectivity groups 6-4 expressed as Log<sub>2</sub> fold  
347 change (PNS macrophages/CNS microglia). (d) Expression plot comparing PNS macrophage-  
348 enriched genes (expressed as PNS macrophage/CNS microglia Log<sub>2</sub>FC) and Sall1<sup>-/-</sup> microglia-  
349 enriched genes (expressed as KO/WT Log<sub>2</sub>FC) from Buttgereit et al. r, correlation coefficient; p, p-  
350 value for linear regression analysis. (e) Representative immunohistochemistry in sciatic nerves of  
351 CX3CR1<sup>GFP/+</sup> mice showing DAPI (blue), GFP (green), MHCII (white), and Clec7a (red).  
352

353 Figure 4) Zonation of PNS macrophage-enriched transcripts in neural resident macrophages. (a) Heat  
354 map showing genes corresponding to PNS to CNS zonation pattern (PNS MΦ's high, SC MG  
355 high/intermediate, brain MG low). Each box represents average from 3 replicates. (b) Gene expression  
356 analysis of individual genes following PNS to CNS zonation pattern. Each dot represents one replicate.  
357 Unpaired t test. Data are mean +/- SD. \* P < 0.05, \*\* P < 0.01, \*\*\* P < 0.001, \*\*\*\* P < 0.0001, (c)  
358 Representative Clec7a staining in brain (Br), spinal cord (SC), dorsal root ganglia (DRG), and sciatic  
359 nerve (SN) of CX3CR1<sup>GFP/+</sup> mice. Scale bars are 100 μm.

360

361 Figure 5) Shared and distinct developmental programs in PNS macrophages. (a) Schematic and flow  
362 cytometric gating for analysis of YFP expression in PNS macrophages from Flt3-Cre LSL-YFP sciatic  
363 nerves. (b) Comparison of YFP- macrophage ratios (expressed as % YFP- cells of population) across  
364 neural resident macrophage populations, monocytes, B cells, and T cells. (n = 4-7 mice per group) (c)  
365 Image showing E8.5 tdTomato labeling and GFP expression in brain (left panel), sciatic nerve (middle  
366 panel), and DRG (right panel) of CSF1R<sup>Mer-iCre-Mer</sup> x tdTomato<sup>fl/fl</sup> x CX3CR1<sup>GFP/+</sup> mice. Scale bar, 100  
367 μm. (d) Quantification of E8.5 tdTomato labeling in brain, PNS, spleen, lungs, kidney, and blood from  
368 newborn pups. Several images were taken and analyzed from each tissue and averages from each  
369 group were plotted. (n=2 mice for blood analysis, n=3 mice for tissue analysis). (e) Histological  
370 representation of PNS macrophages in CCR2<sup>GFP/GFP</sup> sciatic nerves. Scale bar, 100 μm (f)  
371 Quantification of CCR2+ CSF1R+ macrophages in sciatic nerves in CCR2<sup>GFP/+</sup> and CCR2<sup>GFP/GFP</sup> mice  
372 (n=5 mice per group). (g) Quantification of total CSF1R+ macrophages in CCR2<sup>GFP/+</sup> and CCR2<sup>GFP/GFP</sup>  
373 mice (n=5 mice per group). (h) Flow cytometric gating and (i) analysis of sciatic nerve macrophages  
374 from WT and IL-34 KO mice. (n=3 mice per group). (j) Histological quantification of sciatic nerve  
375 macrophages in WT and IL-34 KO mice. At least 3 images were analyzed and averaged for each  
376 nerve (n = 3 mice per group). Scale bar, 100 μm (k) Representative imaging of WT and IL-34 KO  
377 sciatic nerves. CSF1R staining in green. (l) In situ hybridization in WT sciatic nerve showing IL-34  
378 localization with Prx-expressing Schwann cell. Scale bar, 50 μm (m) Flow cytometric representation



379 of CD11b and CD45 expression changes in PNS macrophages from WT (red) and IL-34<sup>LacZ/LacZ</sup> (blue)  
380 mice. Data is reflective of all replicates examined (n=3 mice per group). Each dot represents one  
381 mouse. All data are analyzed by unpaired t test. Data are mean +/- SD. \* P < 0.05, \*\* P < 0.01, \*\*\*  
382 P < 0.001, \*\*\*\* P < 0.0001; ns, not significant.

383

384 Figure 6) Nerve environment shapes transcriptional identity of PNS macrophages. (a) Schematic for  
385 isolation and separate single cell RNA sequencing of YFP+ HSC-derived and YFP- embryonic  
386 macrophages from sciatic nerves of Flt3-Cre LSL-YFP<sup>fl/fl</sup> mice. Two single cell libraries from YFP+ and  
387 YFP- macrophages were prepared using the 10X single cell RNA-seq platform (b) t-SNE plot of 4,121  
388 CD64+ CD45<sup>int</sup> cells from pooled sciatic nerves (n=18) showing unsupervised clustering (left panel)  
389 and overlay of YFP+ (blue) and YFP- (red) populations (right panel). (c) t-SNE plots depicting  
390 distribution of transcripts across combined YFP+ HSC-derived and YFP- embryonic PNS  
391 macrophages. (d) Violin plots of marker gene expression in YFP+ HSC-derived and YFP- embryonic  
392 groups. (e) Flow cytometric identification of CCR2+ macrophages in a subset of YFP+ macrophages.  
393 Gating is representative of at least 7 nerves examined over three separate experiments (f)  
394 Representative imaging of a subset of Lyve1+ macrophages in sciatic nerve.

395

396

397

398 **Supplemental Figures:**

399

400 Supplemental figure 1) Analysis of resident macrophage chimerism in CD45.1 wild type and CD45.2  
401 Lyz2-Cre tdTomato parabionts. Representative flow plots of CD45.1 and CD45.2 expression in nerve  
402 macrophages from CD45.2 parabiont.

403

404 Supplemental Figure 2) Flow cytometric analysis of blood and neural resident macrophages in pulse  
405 chase experiment (related to Figure 1j-l). Representative flow gating of CNS microglia, PNS  
406 macrophages, and monocytes at day 0 and 8 weeks after tamoxifen removal.

407

408 Supplemental figure 3) Gating strategy for identifying PNS macrophages (related to Figure 1) and for  
409 double-sorted populations used in bulk-RNA sequencing.

410

411 Supplemental figure 4) Uniquely downregulated genes in neural resident macrophages. Heat map of  
412 mRNA transcripts fourfold or more downregulated in CNS microglia and PNS macrophages compared  
413 to conventional tissue-resident macrophages.

414

415 Supplemental figure 5) Sall1 expression in PNS macrophages. Flow cytometry analysis of GFP  
416 expression in brain microglia, DRG macrophages, and sciatic nerve macrophages isolated from  
417 Sall1-GFP/+ mice (red) and wild type controls (blue).

418

419 Supplementary Figure 6) Identification of unique signatures in CNS microglia. Heat map and gene list  
420 reveal transcripts selectively enriched in brain and spinal cord microglia fourfold or more compared to  
421 PNS and conventional macrophages.

422

423 Supplementary Figure 7) Downregulated genes in PNS macrophages. Heat map of genes that are  
424 downregulated fourfold or more in PNS macrophages compared to all other populations combined.

425  
426 Supplementary Figure 8) Unique gene expression patterns in individual PNS macrophage  
427 populations. Heat map of upregulated and downregulated mRNA transcripts in single PNS  
428 macrophage populations by fourfold or more in sciatic, fascial, and vagal nerves and eightfold or more  
429 in DRG relative to their expression in the remaining three populations combined.

430  
431 Supplementary Figure 9) Expression of microglial homeostatic genes in spinal cord and brain  
432 microglia. Log<sub>2</sub> expression microglial homeostatic genes in brain (green) and spinal cord (magenta)  
433 microglia. Multiple t tests. Data are mean +/- SEM with adjusted p-value shown.

434  
435 Supplementary Figure 10) Flow cytometric gating of blood and CNS populations in Flt3-Cre LSL-YFP.  
436 Gating strategy for determining YFP- percentages in monocytes, B cells, T cells, brain microglia, and  
437 spinal cord microglia (related to Figure 5b).

438  
439 Supplementary Figure 11) Embryonic 8.5 labeling in blood and non-neuronal tissues. Representative  
440 flow cytometric gating and imaging of tdTomato labeling in blood, spleen, lung, and kidney of  
441 CSF1R<sup>Mer-iCre-Mer</sup> x tdTomato<sup>fl/fl</sup> x CX3CR1<sup>-GFP/+</sup> newborn pups pulsed with tamoxifen at E8.5. Scale  
442 bar, 100 μm.

443  
444 Supplementary Figure 12) CCR2 is not required for seeding and maintaining PNS macrophages  
445 (related to Figure 5). Representative imaging of total CSF1R+ and CCR2+ macrophages in sciatic  
446 nerve sections of CCR2<sup>GFP/+</sup> and CCR2<sup>GFP/GFP</sup> mice. Scale bar, 100 μm.

447

448 Supplementary Figure 13) Schwann cells are a source of IL-34 (related to Figure 5l). In situ  
449 hybridization in sciatic nerve showing colocalization of IL-34 (green) and Prx (magenta). Scale bar,  
450 50  $\mu$ m.

451

452 Supplementary Figure 14) PNS macrophages in IL-34 KO undergo phenotypic shift in CD45 and  
453 CD11b expression (related to Figure 5m). Representative flow gating and expression (median  
454 fluorescence intensity, MFI) of CD45 and CD11b in sciatic nerve macrophages from control and IL-34  
455 KO mice. (n=3 per group).

456

457 Supplementary Figure 15) Quantification of CCR2+ subsets in YFP+ and YFP- macrophages in  
458 Flt3-Cre LSL-YFP mice (related to Figure 6f). Representative gating scheme for identifying CCR2+  
459 macrophages in Flt3-Cre LSL-YFP mice. (n = 3).

460 **Materials and Methods:**

461

462 **Experimental animals.** Mouse care and experiments were performed in accordance with protocols  
463 approved by the Institutional Animal Care and Use Committee at Washington University in St. Louis  
464 under the protocols 20170154 and 20170030. Mice were kept on a 12-hour light dark cycle and  
465 received food and water *ad libitum*. The following strains were used: C57/B6 CD45.1 (stock no.  
466 002014), CX3CR1<sup>GFP/+</sup> (Cx3cr1<sup>tm1Litt/LittJ</sup>; stock no. 008451), LysM<sup>cre/+</sup> (stock no. 004781), and  
467 Rosa<sup>Lsl-Tomato</sup> (stock no. 007905) mice were purchased from Jackson Laboratory (JAX) and bred at  
468 Washington University. CSF1R<sup>Mer-iCre-Mer</sup> mice (39) were obtained from JAX (stock no. 019098) and  
469 backcrossed fully to C57BL/6 background using the speed congenics core facility at Washington  
470 University, MPZ-Cre (40), Flt3-Cre LSL-YFP<sup>fl/fl</sup> (31) mice were kindly provided by D. Denardo,  
471 CCR2<sup>gfp/+</sup> (B6(C)-Ccr2<sup>tm1.1Cln/J</sup>, (JAX stock no. 027619) mice were kindly provided by K. Lavine,  
472 IL34<sup>LacZ/LacZ</sup> mice (15) were kindly provided by M. Colonna, and Sall1<sup>-GFP</sup> mice (24, 41) were kindly  
473 provided by M. Rauchman.

474

475 **IHC.** For whole mount imaging, samples were harvested and immediately stored in 4%  
476 paraformaldehyde (PFA) containing 40% sucrose overnight. Samples were then washed in PBS,  
477 blocked, stained, and imaged. For frozen sections, samples were harvested, stored in PFA/sucrose,  
478 and embedded into OCT. 15 micron cuts were made for sciatic nerves. Sections were then blocked  
479 in 1% BSA, stained, and imaged. Antibodies to the following proteins were used: anti-GFP, Clec7a  
480 (Clone R1-8g7), CSF1R (R&D Systems, Accession # P09581), MHCII (IA/IE clone M5/114.15.2),  
481 LYVE1 (ab14917).

482

483 **Preparation of single-cell suspensions.** For blood, mice were bled from the cheek immediately  
484 before sacrifice and cells were prepared as previously described. For nerves and all other tissues,  
485 mice were sacrificed and perfused with PBS. Nerves were harvested and kept on ice until

486 dissociation. For ImmGen samples, nerves from 4-20 mice were pooled for each replicate. Cells  
487 were then incubated with gentle shaking for 20 minutes in digestion media containing collagenase  
488 IV, hyaluronidase, and DNase. Cells were then washed and filtered through 70  $\mu$ m cell strainers.  
489 For brain and spinal cord, myelin was removed using a 40/80% Percoll gradient.

490

491 **Flow cytometry.** Single-cell suspensions were stained at 4°C. Dead cells were excluded by  
492 propidium iodide (PI). Antibodies to the following proteins were used: B220 (clone RA3-6B2),  
493 CCR2 (clone SA203G11), CD3e (clone 145-2C11), CD4 (clone RM4-5), CD8 (clone 53-6.7), CD11b  
494 (clone M1/70), CD16 (clone 2.4G2), CD45 (clone 30-F11), CD64 (clone X54-5/7.1), CD115 (clone  
495 AFS98), GR1 (clone 1A8), and Ly-6C (clone HK1.4). Cells were analyzed on a LSRII flow cytometer  
496 (Becton Dickinson) and analyzed with FlowJo software.

497

498 **Cell sorting.** For bulk RNAseq, cells from 6-week-old male mice were double sorted on a FACSaria  
499 II (Becton Dickinson) for a final count of 1000 cells into lysis buffer according to the ImmGen  
500 Consortium standard operating protocol. Tissues were collected into culture medium on ice and  
501 subsequently digested with collagenase IV, hyaluronidase, and DNase. Following digestion,  
502 samples were washed and kept on ice until sorting. The sort was repeated so that all cells were  
503 sorted twice, with a minimum of 1000 cells recovered in the second sort, sorting the second time into  
504 5  $\mu$ l TCL buffer containing 5% BME. Samples were kept at -80° C until further processing. For  
505 sorting in preparation of the Flt3-Cre LSL-YFP single cell Seq experiments, sciatic nerves from 19  
506 male mice aged 10-12 weeks were combined and CD64+ CD45int macrophages were sorted  
507 individually into YFP+ and YFP- groups, yielding 18,000 and 5,000 cells, respectively. Both groups  
508 were immediately run on the 10x Genomics Chromium Controller according to the manufacturer's  
509 protocol.

510

511 **Parabiosis.** Parabiotic pairs were generated as previously described (38). C57/B6 (CD45.1) mice  
512 were paired with Lyz2Cre tdTomato (CD45.2) mice. Mice were injected with buprenorphine-SR  
513 subcutaneously prior to surgery. After 10 weeks, mice were sacrificed and nerve tissue was  
514 examined by flow cytometry and imaging to detect hematopoietic contribution to PNS resident  
515 macrophages. T cells in blood was used as a positive control.

516

517 **Pulse chase.** Male and female heterozygous CSF1R<sup>Mer-iCre-Mer</sup> tdTomato were fed tamoxifen diet for  
518 four weeks to label resident cells. Blood was collected at day 0, 3 weeks, 4 weeks, and 8 weeks  
519 after tamoxifen removal. Peripheral nerves from sciatic nerves, fascial nerves, vagal nerves, and  
520 DRG were pooled (PNS) and examined along with pooled brain and spinal cord (CNS) by flow  
521 cytometry at day 0 and 8 weeks following tamoxifen removal.

522

523 **RNAseq and data analyses.** Library preparation, RNA-sequencing, data generation and quality-  
524 control was conducted by the ImmGen Consortium according to the consortium's standard protocols  
525 ([https://www.immgen.org/Protocols/ImmGenULI\\_RNAseq\\_methods.pdf](https://www.immgen.org/Protocols/ImmGenULI_RNAseq_methods.pdf)). In short, the reads were  
526 aligned to the mouse genome GRCm38/mm10 primary assembly and gene annotation vM16 using  
527 STAR 2.5.4a. The raw counts were generated by using featureCounts  
528 (<http://subread.sourceforge.net/>). Normalization was performed using the DESeq2 package from  
529 Bioconductor. Differential gene expression analysis was performed using edgeR 3.20.9 in a pairwise  
530 manner among all conditions, and a total of 12,241 differentially expressed genes were defined with  
531 a p-value  $\leq 0.001$  and  $\geq 4$ -fold difference. To construct the correlation plot, Euclidean distance  
532 among samples were calculated based on the differential expression matrix and clustering was  
533 performed using the ward.D2 algorithm in R. CNS/PNS shared, PNS-specific and CNS-specific  
534 genes were determined by subclustering the differentially expressed genes based on the expression  
535 pattern with a refined k-mean clustering using R and followed by manual curations. For neuronal

536 microenvironment analysis, only the transcriptome profile of macrophages and microglia from PNS  
537 and CNS were used and analyzed through the same pipeline as mentioned above.

538

539 **Comparison of published microglia data.** External datasets for circos plot were obtained from  
540 Krasemann et al. Genes that are enriched in SOD1G93A, aging brain, MFP2<sup>-/-</sup>, brain irradiation,  
541 Alzheimer's disease (5XFAD) and phagocytic microglia conditions were previously generated in  
542 Krasemann et al. By comparing the PNS and CNS-enriched genes with the disease signatures, we  
543 were able to define the number of conditions shared by the genes and coined the term as  
544 "connectivity". Only genes with connectivity of 2 or above are shown in the circos plot. For the  
545 comparison with Sall1<sup>-/-</sup> data set (24), the log<sub>2</sub> fold change of genes between CNS microglia and  
546 PNS macrophages were calculated and compared against the public data set. Correlation coefficient  
547 and p-value were calculated by lineregress in Scipy using Python3.

548

549

550 **Embryonic labeling.** Homozygous CX3CR1-GFP female mice were rotated daily with CSF1R<sup>Mer-</sup>  
551 <sup>iCre-Mer</sup> tdTomato male mice and checked for plugs in the morning. Plug-positive females were  
552 administered 1.5 mg of 4-Hydroxytamoxifen (Sigma, Cat. # H6278) and 1 mg of progesterone  
553 (Sigma, Cat. # P0130) dissolved in corn oil by oral gavage 8 days following identification of plugs in  
554 order to pulse the embryos at embryonic 8.5 days. Following birth, pups were immediately  
555 sacrificed. Blood was collected for flow cytometric analysis and tissues were fixed in PFA/sucrose  
556 for imaging.

557

558 **In situ hybridization.** RNA in situ hybridization (ISH) was performed using the ViewRNA Tissue  
559 Assay Core Kit (Invitrogen Cat. # 19931) according to the manufacturer's instructions, with a probe  
560 set designed for IL-34 and Prx.

561



562 **Cell preparation, 10X Single cell library preparation, sequencing and analyses.** A total of 4,500  
563 Flt3-negative and 16,000 Flt3-positive cells were loaded to separate lanes of the 10X Chip for  
564 preparation of two single-cell libraries. The library preparation was performed according to the  
565 manufacturer's instructions (Chromium Single-cell v2; 10X Genomics, USA). A total of 153M and  
566 174M reads were sequenced for Flt3-negative and Flt3-positive libraries respectively using Illumina  
567 HiSeq2500. Reads were mapped by using the cellranger pipeline v2.1.1 onto the reference genome  
568 grcm38/mm10. We filtered cells for those with  $\geq 50,000$  mapped reads, leaving ~1k Flt3 negative and  
569 4k Flt3 positive cells. Downstream analyses were performed by using the package Seurat2 in R.  
570

571 **References:**

- 572 1. Keren-Shaul, H., et al. (2017). "A Unique Microglia Type Associated with Restricting Development  
573 of Alzheimer's Disease." Cell **169**(7): 1276-1290 e1217.
- 574 2. Li, Q. and B. A. Barres (2018). "Microglia and macrophages in brain homeostasis and disease." Nat  
575 Rev Immunol **18**(4): 225-242.
- 576 3. Frost, J. L. and D. P. Schafer (2016). "Microglia: Architects of the Developing Nervous System."  
577 Trends Cell Biol **26**(8): 587-597.
- 578 4. Deczkowska, A., et al. (2018). "Disease-Associated Microglia: A Universal Immune Sensor of  
579 Neurodegeneration." Cell **173**(5): 1073-1081.
- 580 5. Butovsky, O., et al. (2014). "Identification of a unique TGF-beta-dependent molecular and functional  
581 signature in microglia." Nat Neurosci **17**(1): 131-143.
- 582 6. Krasemann, S., et al. (2017). "The TREM2-APOE Pathway Drives the Transcriptional Phenotype  
583 of Dysfunctional Microglia in Neurodegenerative Diseases." Immunity **47**(3): 566-581 e569.
- 584 7. Kaucka, M. and I. Adameyko (2014). "Non-canonical functions of the peripheral nerve." Exp Cell  
585 Res **321**(1): 17-24.
- 586 8. Chandran, V., et al. (2016). "A Systems-Level Analysis of the Peripheral Nerve Intrinsic Axonal  
587 Growth Program." Neuron **89**(5): 956-970.
- 588 9. Klein, D. and R. Martini (2016). "Myelin and macrophages in the PNS: An intimate relationship in  
589 trauma and disease." Brain Res **1641**(Pt A): 130-138.
- 590 10. Shepherd, A. J., et al. (2018). "Macrophage angiotensin II type 2 receptor triggers neuropathic  
591 pain." Proc Natl Acad Sci U S A **115**(34): E8057-E8066.
- 592 11. Cattin, A. L., et al. (2015). "Macrophage-Induced Blood Vessels Guide Schwann Cell-Mediated  
593 Regeneration of Peripheral Nerves." Cell **162**(5): 1127-1139.

- 594 12. Goodrum, J. F. and D. L. Novicki (1988). "Macrophage-like cells from explant cultures of rat sciatic  
595 nerve produce apolipoprotein E." J Neurosci Res **20**(4): 457-462.
- 596 13. Monaco, S., et al. (1992). "MHC-positive, ramified macrophages in the normal and injured rat  
597 peripheral nervous system." J Neurocytol **21**(9): 623-634.
- 598 14. Ginhoux, F., et al. (2010). "Fate mapping analysis reveals that adult microglia derive from primitive  
599 macrophages." Science **330**(6005): 841-845.
- 600 15. Wang, Y., et al. (2012). "IL-34 is a tissue-restricted ligand of CSF1R required for the  
601 development of Langerhans cells and microglia." Nat Immunol **13**(8): 753-760.
- 602 16. Pirzgalska, R. M., et al. (2017). "Sympathetic neuron-associated macrophages contribute to  
603 obesity by importing and metabolizing norepinephrine." Nat Med **23**(11): 1309-1318.
- 604 17. De Schepper, S., et al. (2018). "Self-Maintaining Gut Macrophages Are Essential for Intestinal  
605 Homeostasis." Cell **175**(2): 400-415 e413.
- 606 18. Gautier, E. L., et al. (2012). "Gene-expression profiles and transcriptional regulatory pathways that  
607 underlie the identity and diversity of mouse tissue macrophages." Nat Immunol **13**(11): 1118-1128.
- 608 19. Dick, S. A., et al. (2019). "Self-renewing resident cardiac macrophages limit adverse remodeling  
609 following myocardial infarction." Nat Immunol **20**(1): 29-39.
- 610 20. Di Liberto, G., et al. (2018). "Neurons under T Cell Attack Coordinate Phagocyte-Mediated  
611 Synaptic Stripping." Cell **175**(2): 458-471 e419.
- 612 21. Lavin, Y., et al. (2014). "Tissue-resident macrophage enhancer landscapes are shaped by the  
613 local microenvironment." Cell **159**(6): 1312-1326.
- 614 22. Deming, Y., et al. (2019). "The MS4A gene cluster is a key modulator of soluble TREM2 and  
615 Alzheimer's disease risk." Sci Transl Med **11**(505).

- 616 23. Friedman, B. A., et al. (2018). "Diverse Brain Myeloid Expression Profiles Reveal Distinct Microglial  
617 Activation States and Aspects of Alzheimer's Disease Not Evident in Mouse Models." *Cell Rep* **22**(3):  
618 832-847.
- 619 24. Buttgereit, A., et al. (2016). "Sall1 is a transcriptional regulator defining microglia identity and  
620 function." *Nat Immunol* **17**(12): 1397-1406.
- 621 25. Lund, H., et al. (2018). "Fatal demyelinating disease is induced by monocyte-derived macrophages  
622 in the absence of TGF-beta signaling." *Nat Immunol* **19**(5): 1-7.
- 623 26. Haimon, Z., et al. (2018). "Re-evaluating microglia expression profiles using RiboTag and cell  
624 isolation strategies." *Nat Immunol* **19**(6): 636-644.
- 625 27. Ziv, Y., et al. (2006). "Immune cells contribute to the maintenance of neurogenesis and spatial  
626 learning abilities in adulthood." *Nat Neurosci* **9**(2): 268-275.
- 627 28. Bennett, F. C., et al. (2018). "A Combination of Ontogeny and CNS Environment Establishes  
628 Microglial Identity." *Neuron* **98**(6): 1170-1183 e1178.
- 629 29. Cronk, J. C., et al. (2018). "Peripherally derived macrophages can engraft the brain independent  
630 of irradiation and maintain an identity distinct from microglia." *J Exp Med* **215**(6): 1627-1647.
- 631 30. Gomez Perdiguero, E., et al. (2015). "Tissue-resident macrophages originate from yolk-sac-  
632 derived erythro-myeloid progenitors." *Nature* **518**(7540): 547-551.
- 633 31. Zhu, Y., et al. (2017). "Tissue-Resident Macrophages in Pancreatic Ductal Adenocarcinoma  
634 Originate from Embryonic Hematopoiesis and Promote Tumor Progression." *Immunity* **47**(3): 597.
- 635 32. Epelman, S., et al. (2014). "Embryonic and adult-derived resident cardiac macrophages are  
636 maintained through distinct mechanisms at steady state and during inflammation." *Immunity* **40**(1):  
637 91-104.
- 638 33. Mueller, M., et al. (2003). "Macrophage response to peripheral nerve injury: the quantitative  
639 contribution of resident and hematogenous macrophages." *Lab Invest* **83**(2): 175-185.

- 640 34. Stratton, J. A., et al. (2018). "Macrophages Regulate Schwann Cell Maturation after Nerve  
641 Injury." Cell Rep 24(10): 2561-2572 e2566.
- 642 35. Goldmann, T., et al. (2016). "Origin, fate and dynamics of macrophages at central nervous  
643 system interfaces." Nat Immunol 17(7): 797-805.
- 644 36. Van Hove, H., et al. (2019). "A single-cell atlas of mouse brain macrophages reveals unique  
645 transcriptional identities shaped by ontogeny and tissue environment." Nat Neurosci.
- 646 37. Li, Q., et al. (2019). "Developmental Heterogeneity of Microglia and Brain Myeloid Cells  
647 Revealed by Deep Single-Cell RNA Sequencing." Neuron 101(2): 207-223 e210.
- 648 38. Kim, K. W., et al. (2016). "MHC II+ resident peritoneal and pleural macrophages rely on IRF4 for  
649 development from circulating monocytes." J Exp Med 213(10): 1951-1959.
- 650 39. Qian, B. Z., et al. (2011). "CCL2 recruits inflammatory monocytes to facilitate breast-tumour  
651 metastasis." Nature 475(7355): 222-225.
- 652
- 653 40. Feltri, M. L., et al. (1999). "P0-Cre transgenic mice for inactivation of adhesion molecules in  
654 Schwann cells." Ann N Y Acad Sci 883: 116-123.
- 655
- 656 41. Takasato, M., et al. (2004). "Identification of kidney mesenchymal genes by a combination of  
657 microarray analysis and Sall1-GFP knockin mice." Mech Dev 121(6): 547-557.

658 Acknowledgments: We thank all our collaborators at Washington University School of Medicine  
659 (WUSM) for their advice and discussion. We thank Richard Head, Ruteja Barve, and the Genome  
660 Technology Access Center (GTAC) at WUSM for discussion and assistance with RNA sequencing.  
661 We thank John Baer and David DeNardo for providing Flt3-Cre LSL-YFP<sup>fl/fl</sup> mice. We thank Kory  
662 Lavine for providing Ccr2<sup>GFP/GFP</sup> mice and Marco Colonna and Susan Gilfillan for providing IL-  
663 34<sup>LacZ/LacZ</sup> mice. We thank Jesse Williams, Amy Strickland and Yingyue Zhou for experimental  
664 assistance. We thank Wilbur Song for discussion and Joseph Bloom for reading the manuscript. We  
665 also thank our colleagues at the ImmGen Project consortium, especially Kumba Seddu for  
666 coordinating transfer of samples and data. We thank Nan Zhang for help with revisions and Emma  
667 Erlich for help with data analysis. This project was supported by NIH grants R37AI049653 and  
668 DP1DK109668 to G.J.R. and RF1AF013730 and R01NS105645 to J.M.; and the Principles in  
669 Pulmonary Research training grant (T32 HL007317-41) to P.L.W. Further support was provided by  
670 P30AR073752 that supports Rheumatic Diseases Research Resource-Based Center and NIH R24  
671 AI072073 that funds the ImmGen Project.

672

673

674 **Author contributions:** P.L.W. purified macrophage populations, designed and performed the  
675 experiments, analyzed data, and wrote the manuscript. A.Y. analyzed RNAseq data and helped with  
676 experiments and writing of the manuscript; K.K. purified macrophage populations and discussed  
677 results; D.A. and R.C. helped with experiments and discussed results; M.C. provided conceptual  
678 feedback and the IL-34<sup>-/-</sup> strain; G.J.R. and J.M. designed and supervised the experiments and  
679 edited the manuscript. The Immunological Genome Project set standards for data acquisition,  
680 conducted sequencing, QC, and generation of raw data for bulk RNA samples.

681

682

683

**Figure 1**

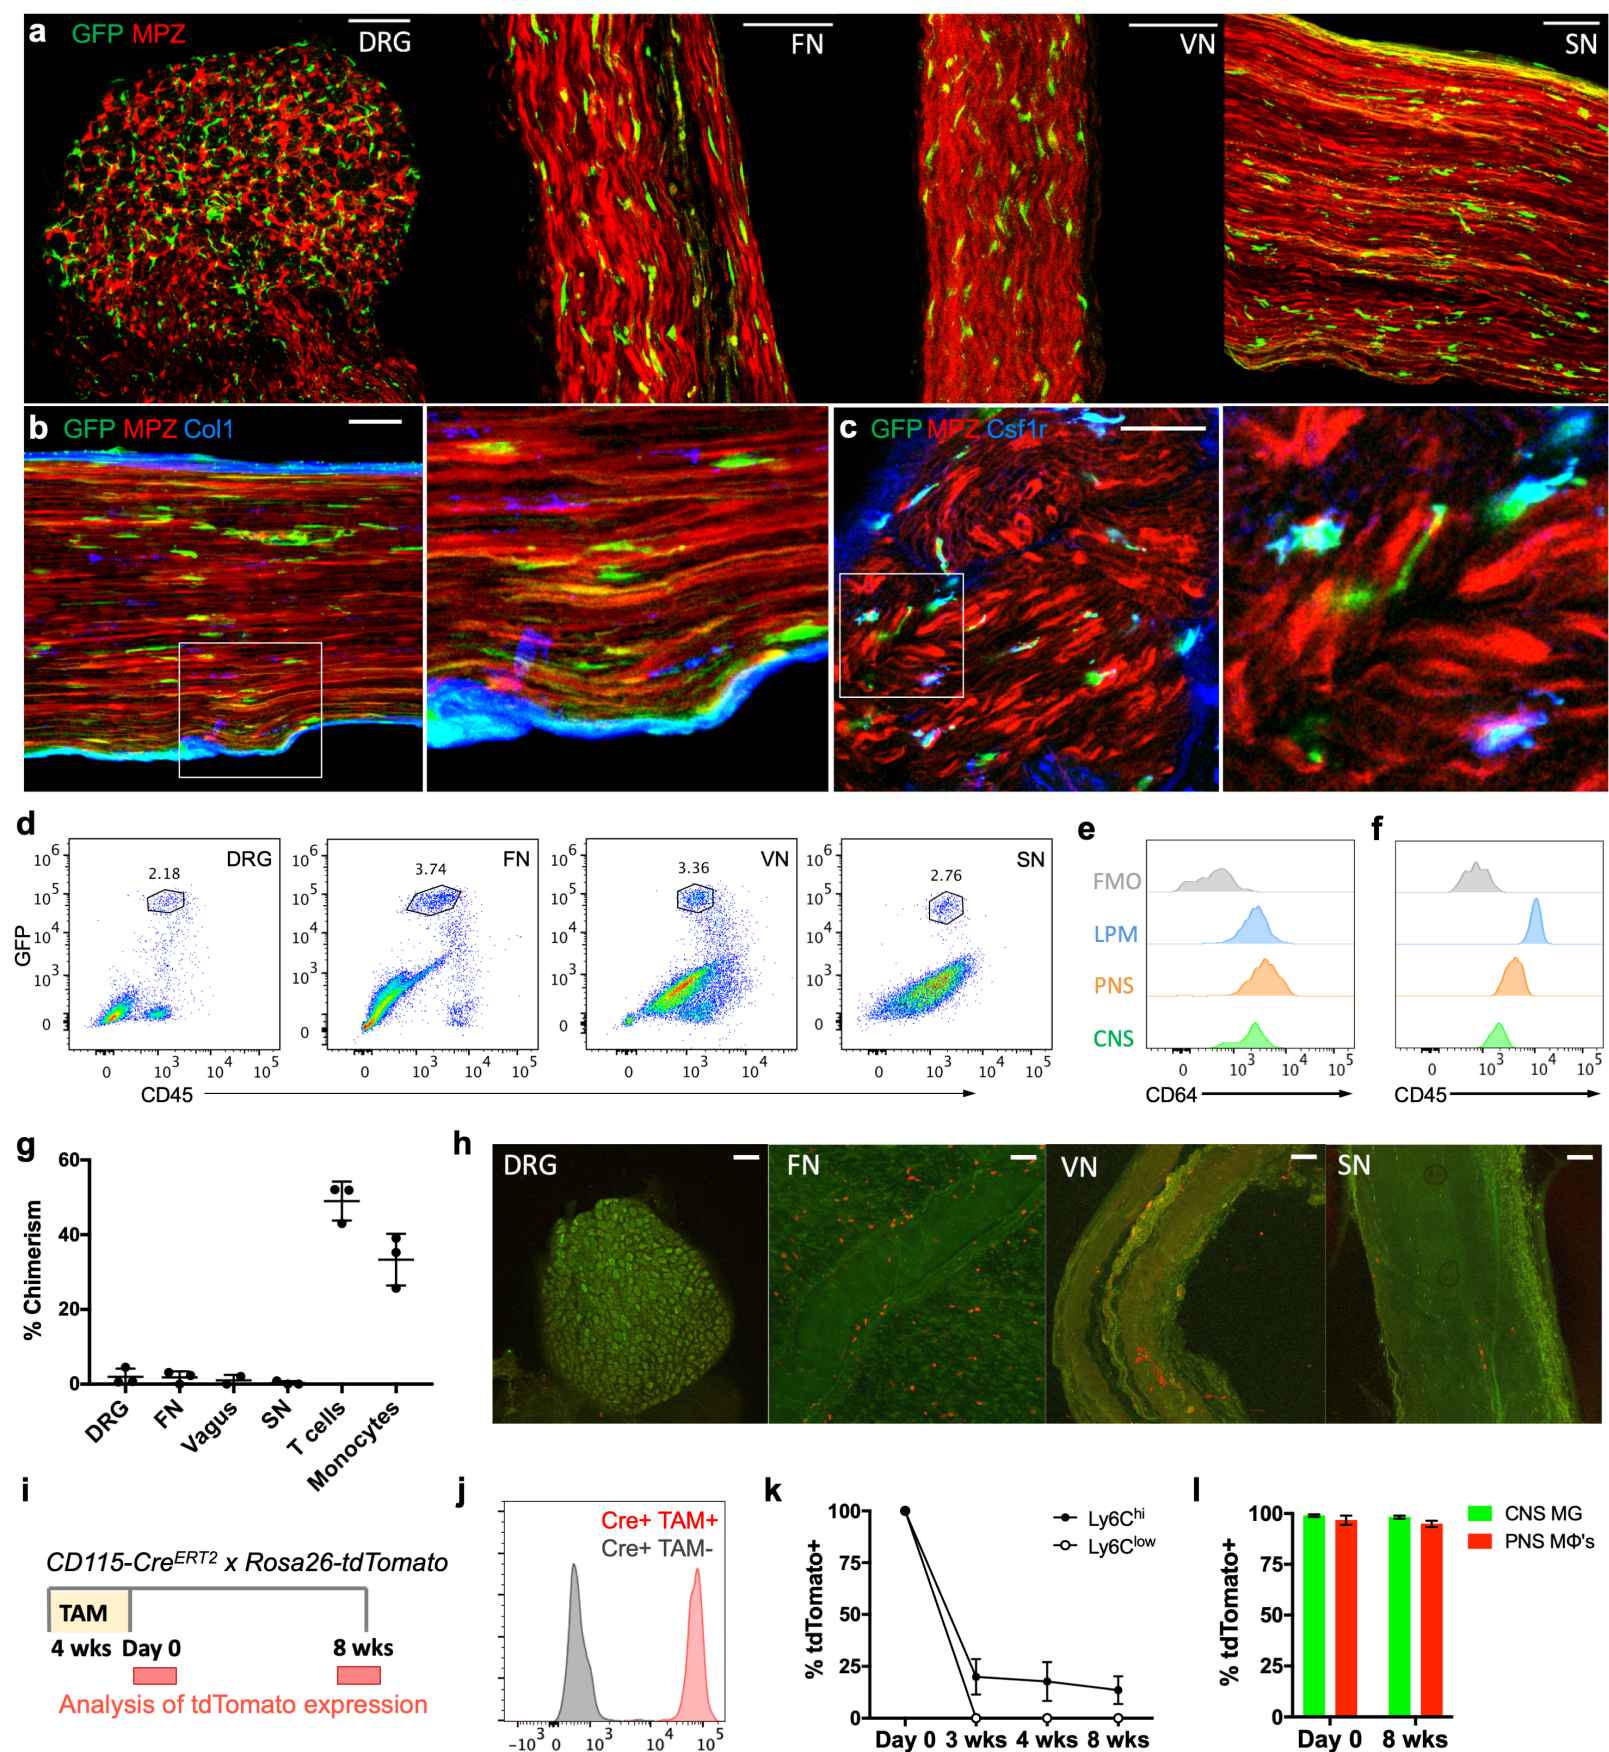

## Figure 2

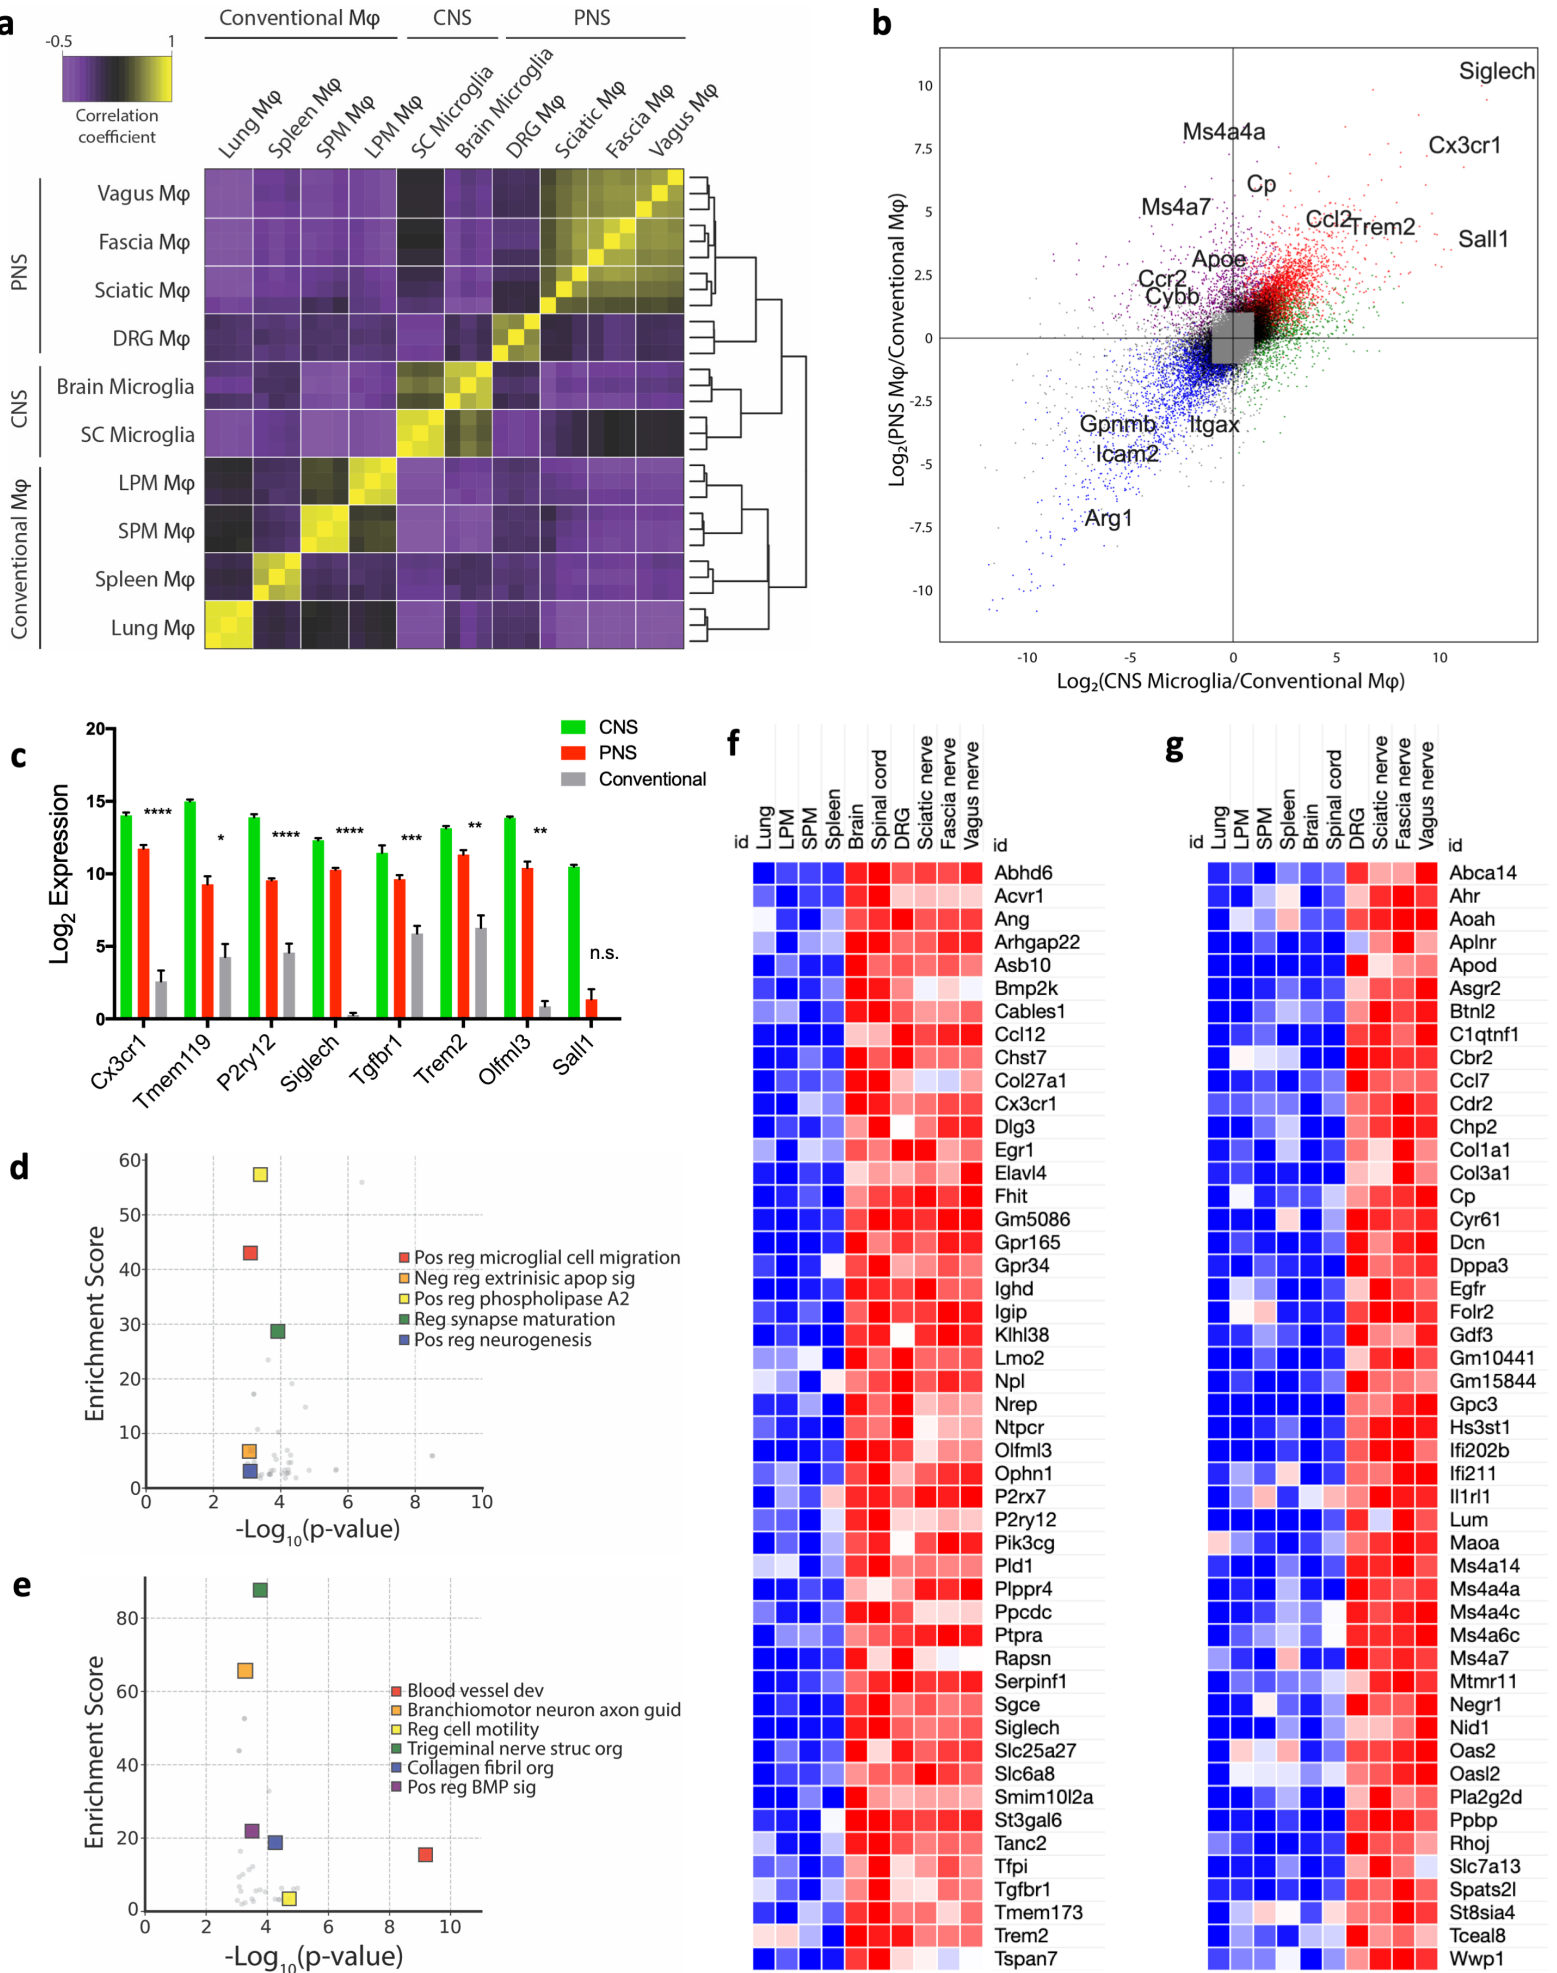



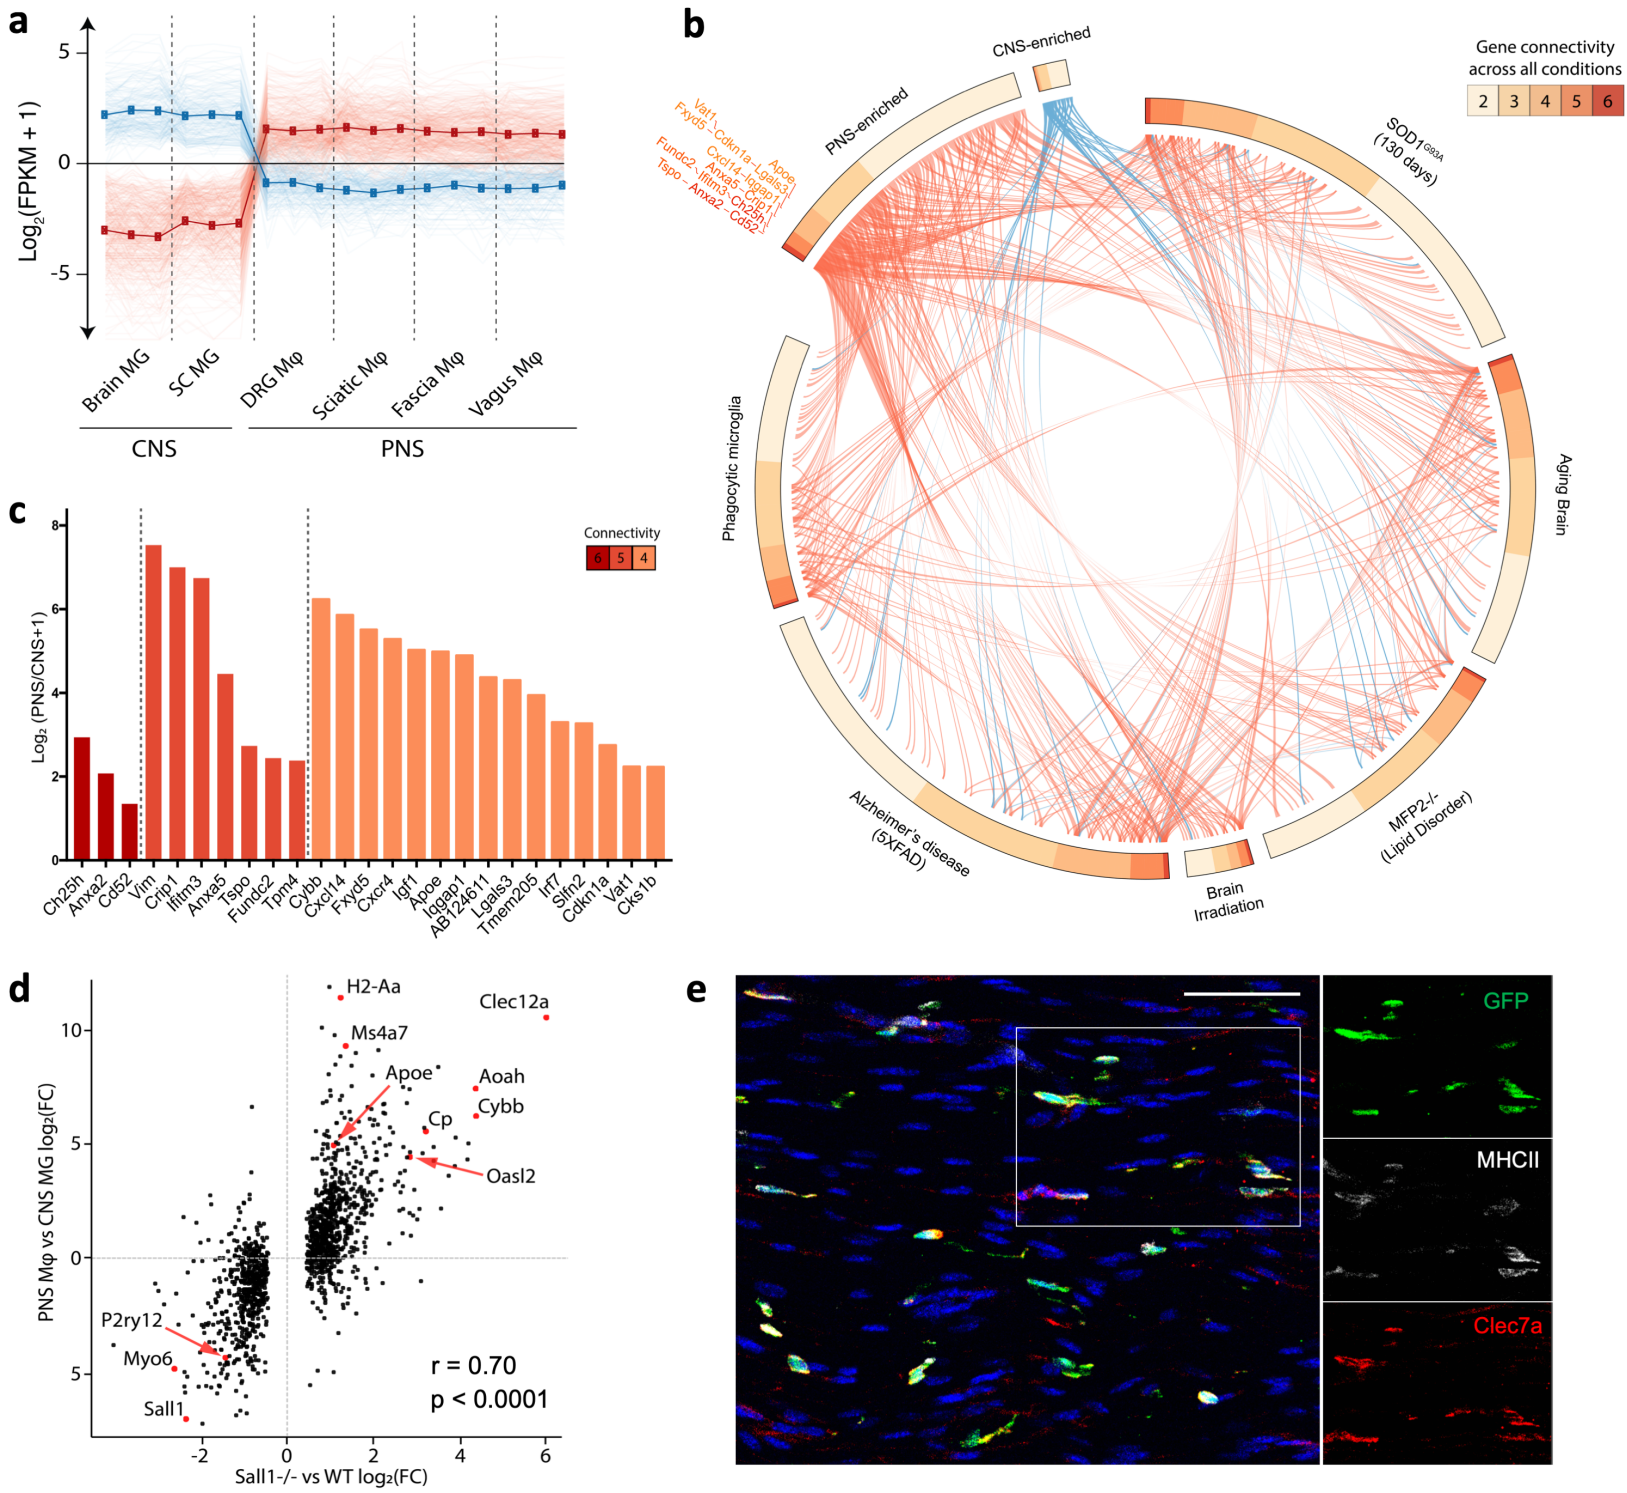

## Figure 4

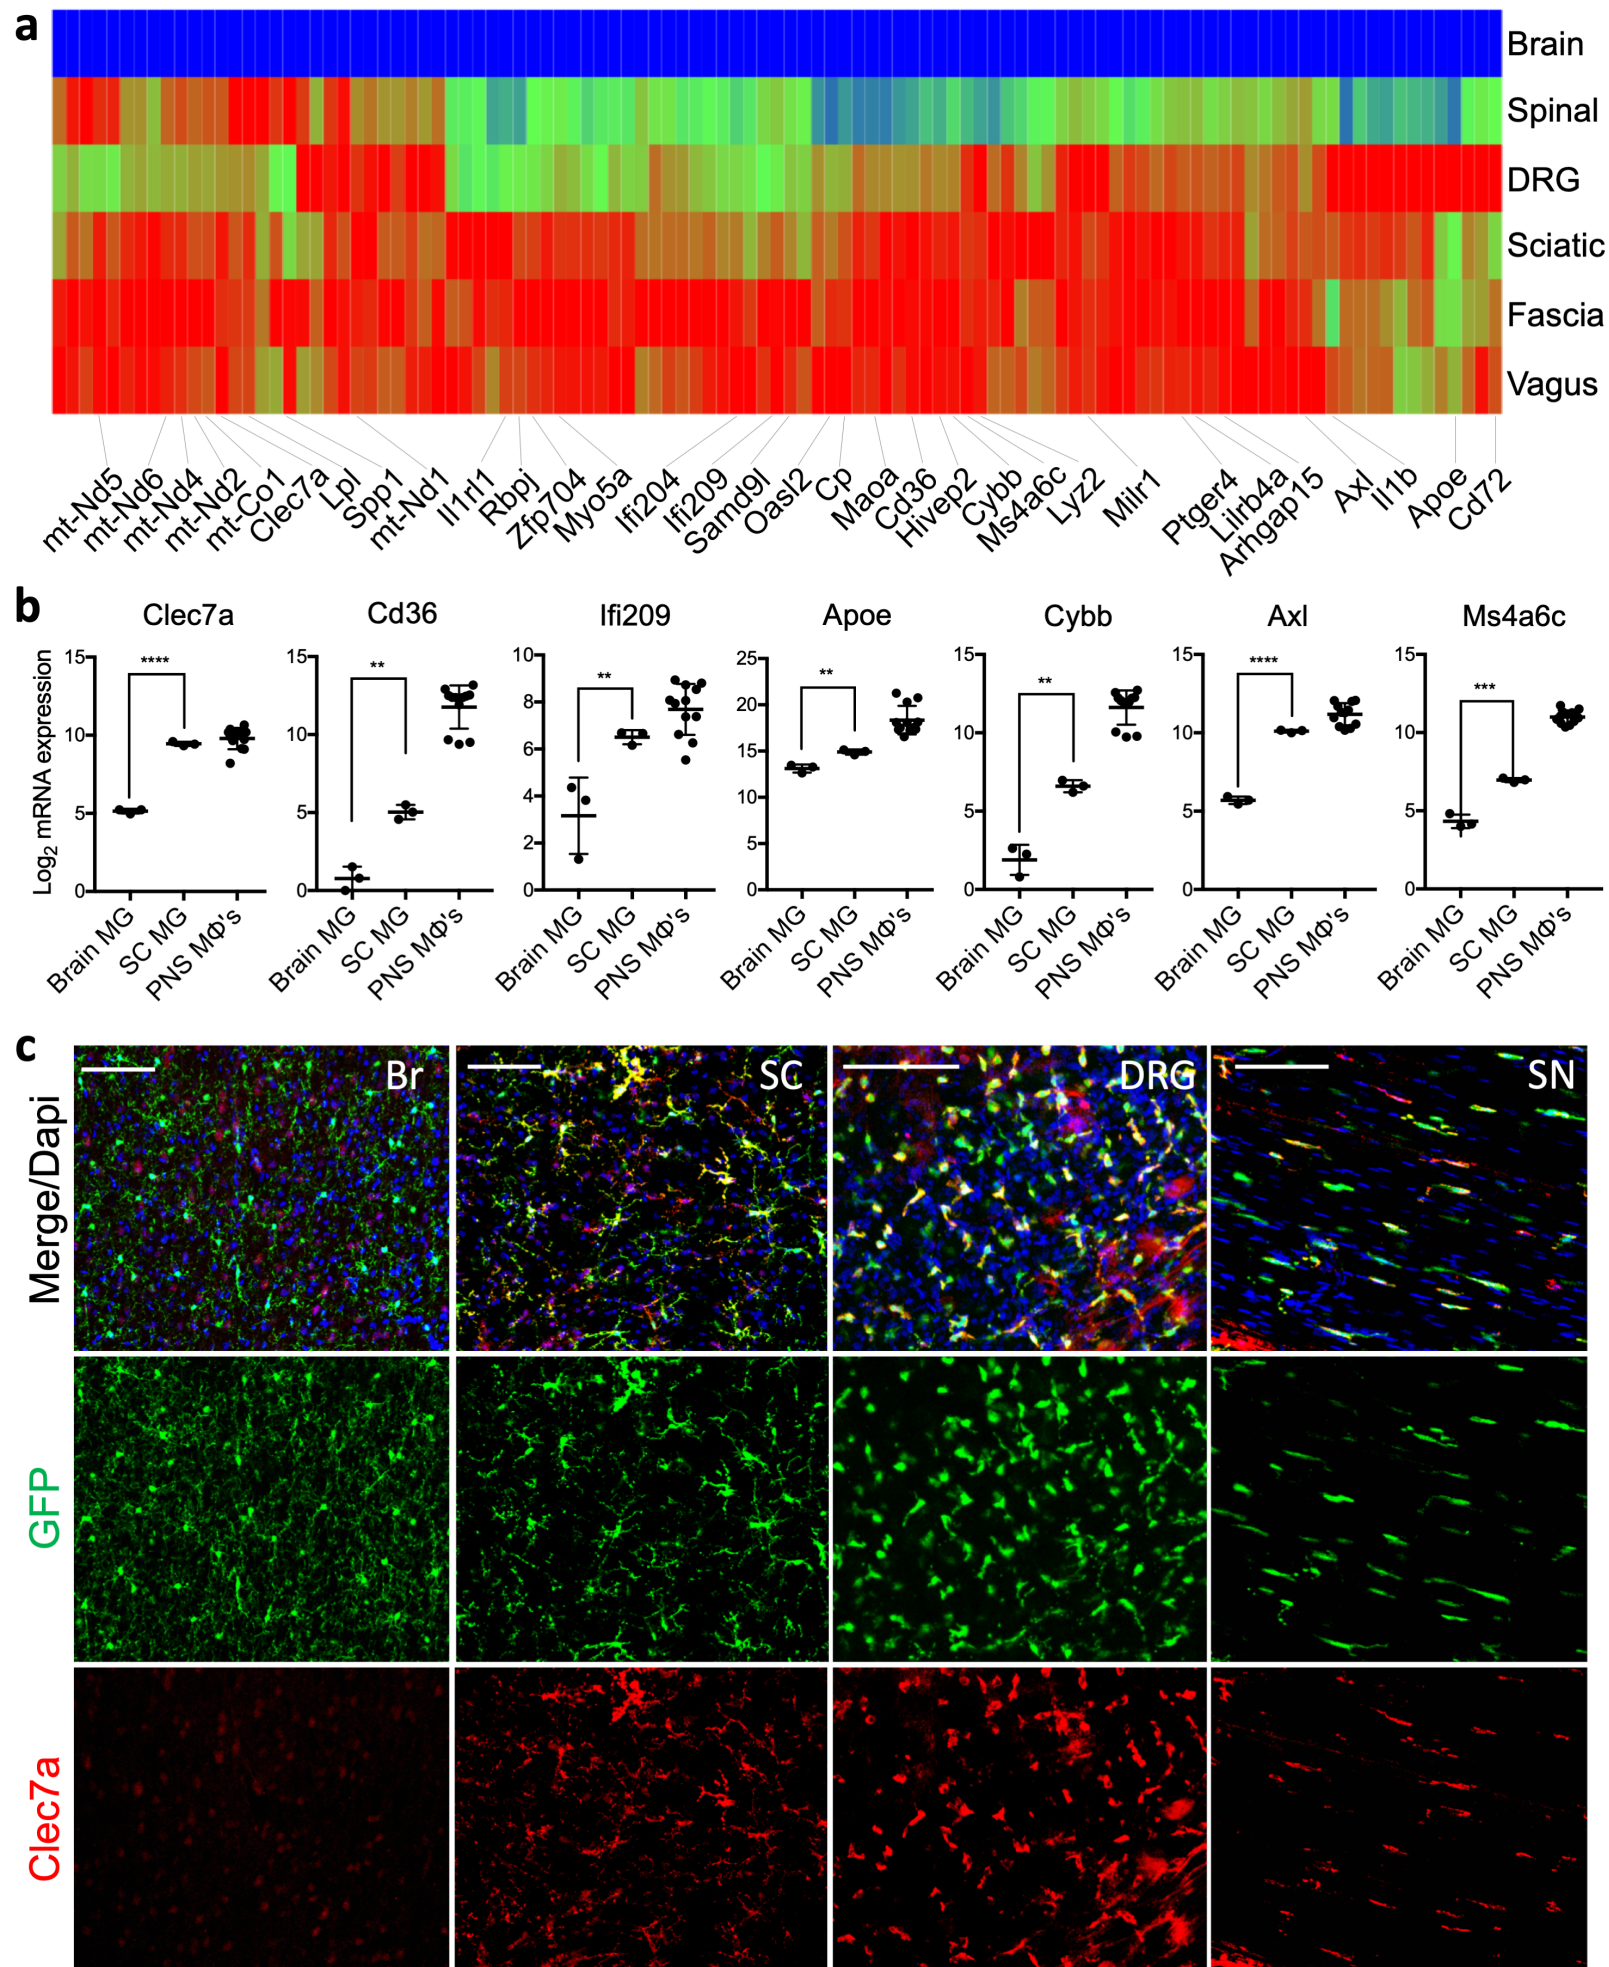

**Figure 5**

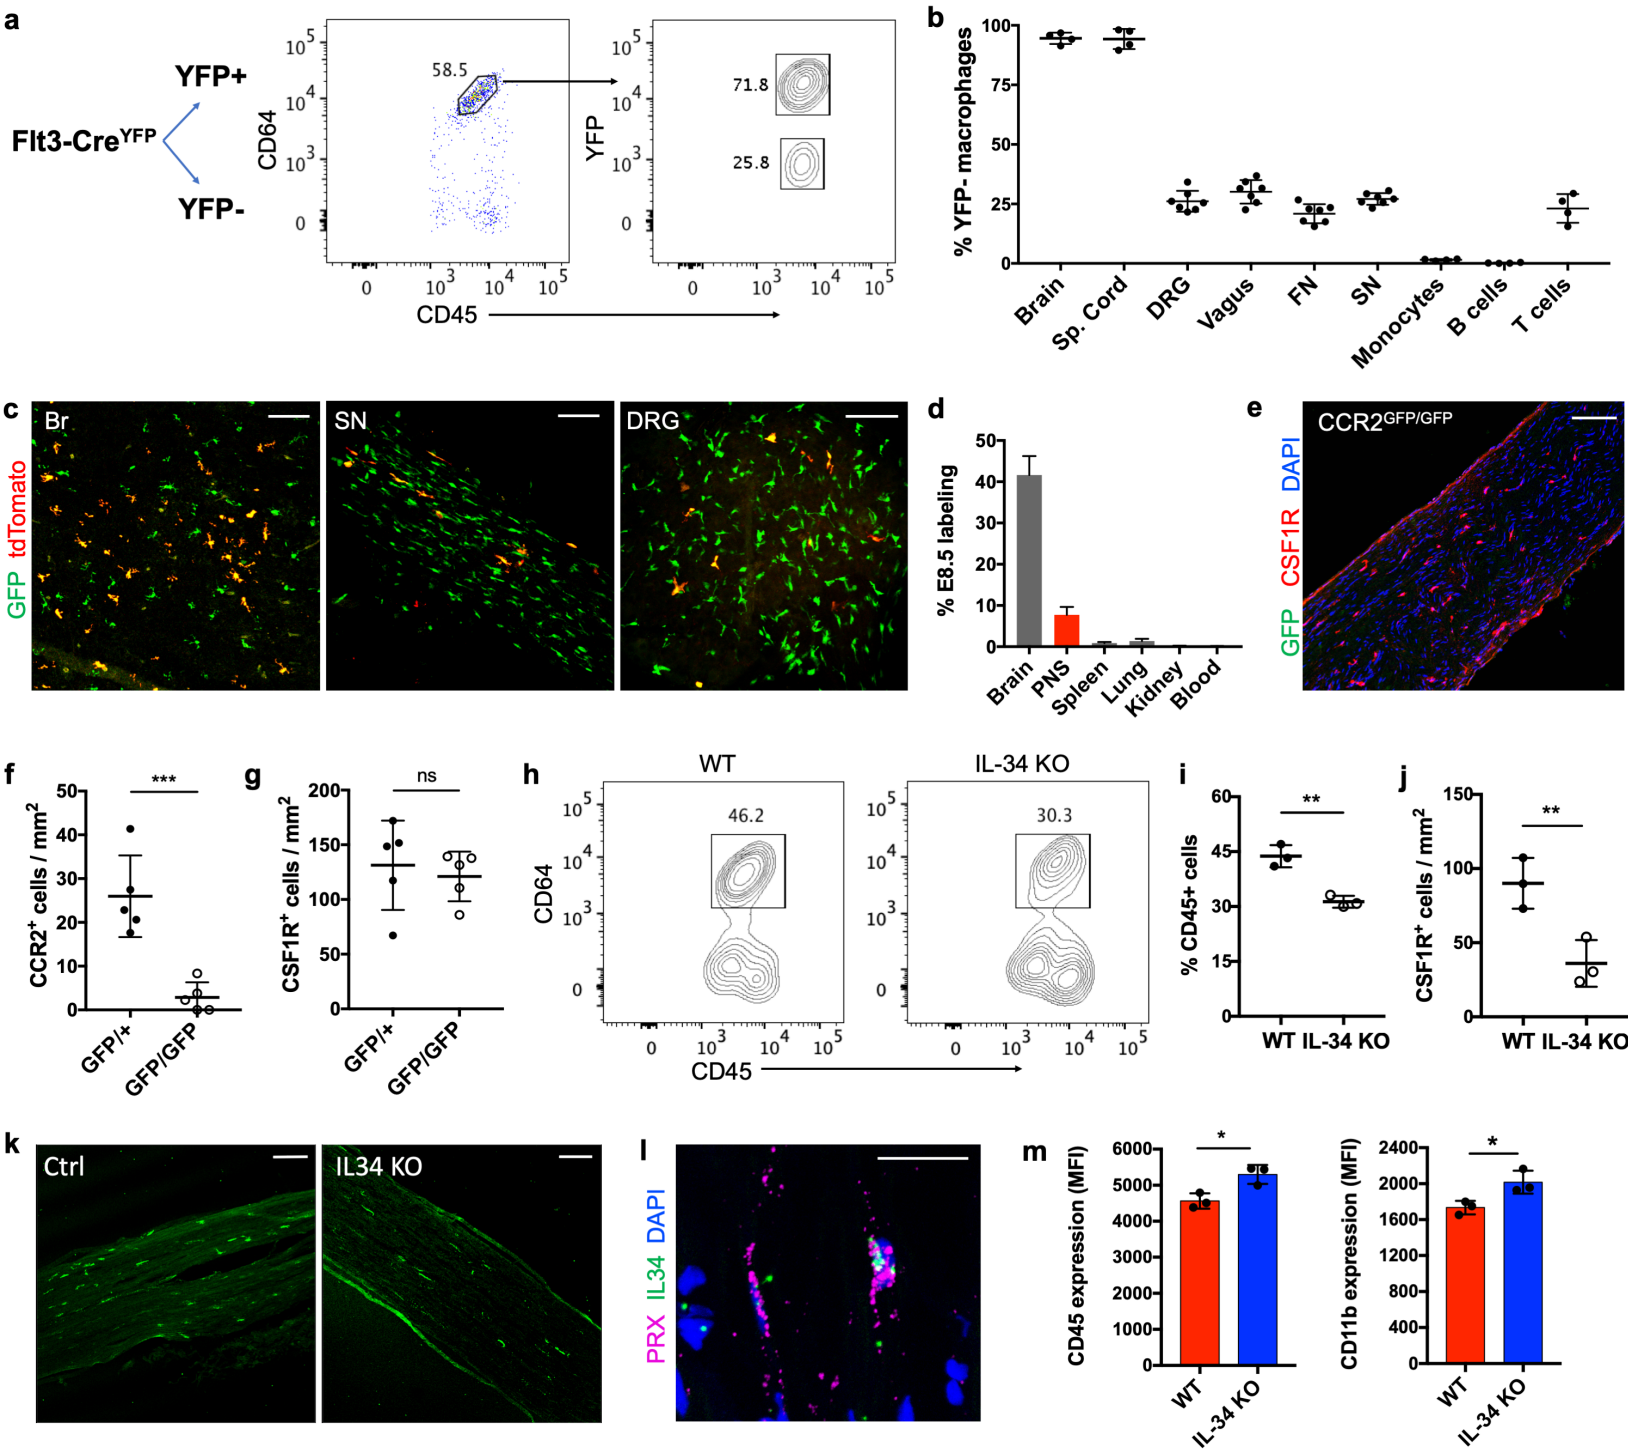

## Figure 6

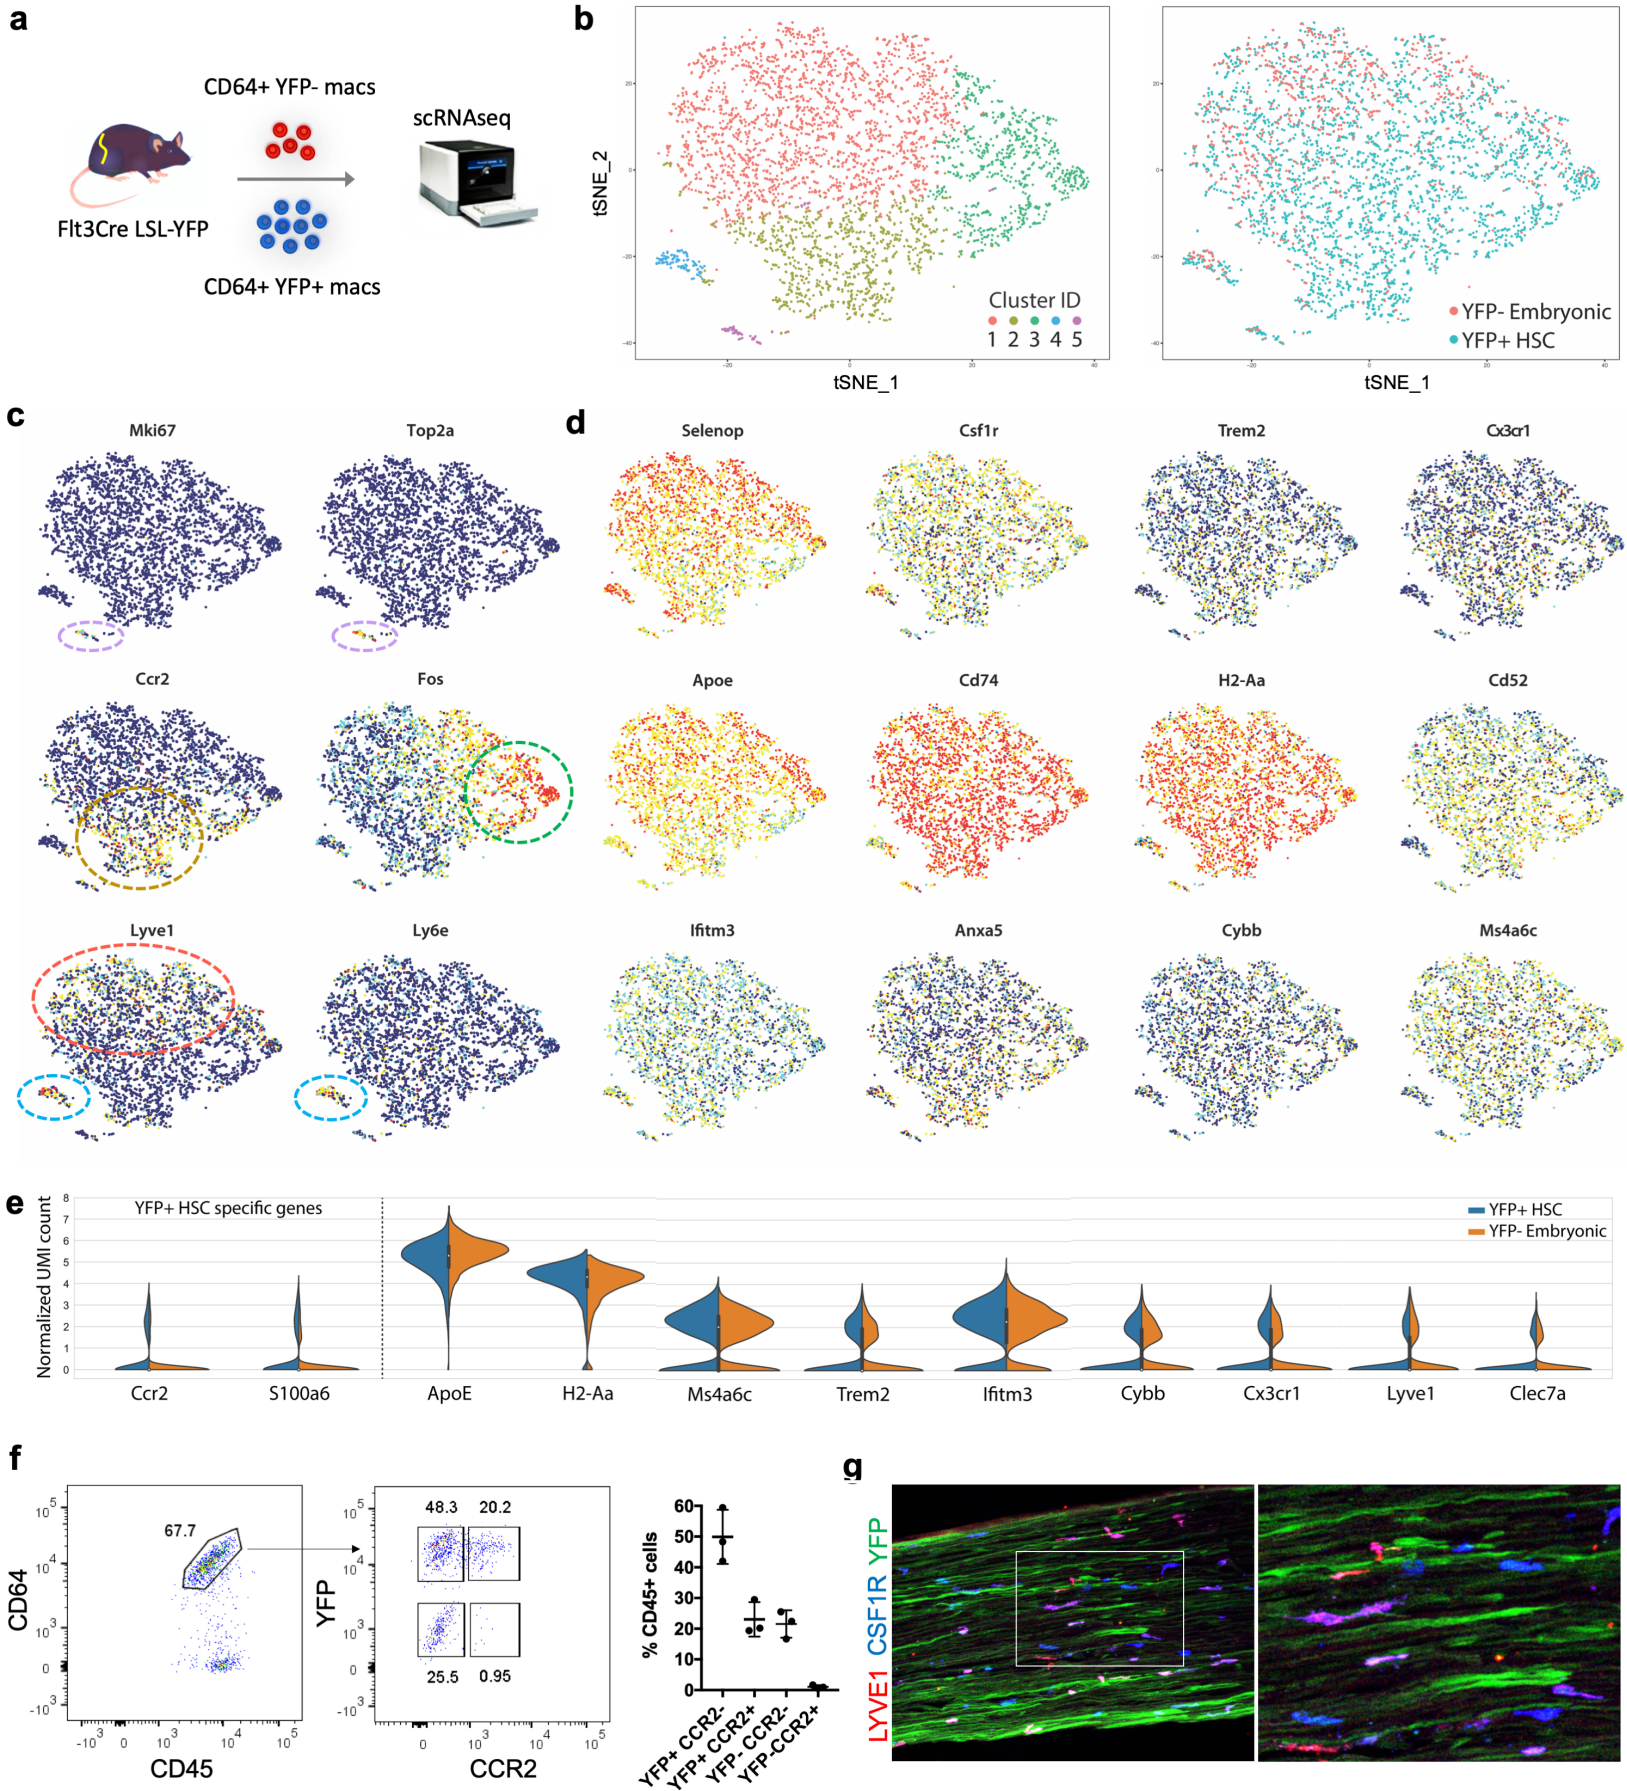

Source: https://www.biorxiv.org/content/biorxiv/early/2019/12/20/2019.12.19.883546.full.pdf
